1 **Furanoditerpenoid biosynthesis in the bioenergy crop switchgrass is catalyzed by an**  
2 **alternate metabolic pathway**

3  
4 **Andrew Muchlinski<sup>1#</sup>, Meirong Jia<sup>1#^</sup>, Kira Tiedge<sup>1£</sup>, Jason S. Fell<sup>2£</sup>, Kyle A. Pelot<sup>1</sup>, Lisl**  
5 **Chew<sup>1</sup>, Danielle Davisson<sup>1</sup>, Yuxuan Chen<sup>1</sup>, Justin Siegel<sup>2,3,4</sup>, John T. Lovell<sup>5</sup>, Philipp**  
6 **Zerbe<sup>1\*</sup>**

7  
8 <sup>1</sup>Department of Plant Biology, University of California-Davis, Davis, CA, USA.

9 <sup>2</sup>Genome Center, University of California-Davis, Davis, CA, USA.

10 <sup>3</sup>Department of Chemistry, University of California-Davis, Davis, CA, USA.

11 <sup>4</sup>Department of Biochemistry & Molecular Medicine, University of California-Davis, Davis, CA,  
12 USA.

13 <sup>5</sup>Genome Sequencing Center, Hudson Alpha Institute for Biotechnology, Huntsville, AL, USA.

14

15 \*To whom correspondence should be addressed: Philipp Zerbe; email: [pzerbe@ucdavis.edu](mailto:pzerbe@ucdavis.edu);  
16 phone: (530) 754-9652; ORCID ID: 0000-0001-5163-9523.

17 <sup>#,£</sup> These authors contributed equally to this work.

18 <sup>^</sup>Current address: State Key Laboratory of Bioactive Substance and Function of Natural  
19 Medicines & NHC Key Laboratory of Biosynthesis of Natural Products, Institute of Materia  
20 Medica, Chinese Academy of Medical Sciences & Peking Union Medical College, Beijing  
21 100050, China.

22

23 **Key words.** Cytochrome P450 monooxygenase, diterpenoid biosynthesis, plant specialized  
24 metabolism, plant natural products, *Panicum virgatum*.

25

26 **Abbreviations.** diTPS, diterpene synthase; P450, cytochrome P450 monooxygenase; CPS,  
27 copalyl diphosphate synthase; KSL, kaurene synthase-like; Pv, *Panicum virgatum*; GGPP,  
28 geranylgeranyl pyrophosphate; CPP, copalyl pyrophosphate; LPP, labda-13-en-8-ol  
29 pyrophosphate; CLPP, clerodienyl pyrophosphate; GC-MS, gas chromatography-mass  
30 spectrometry; HPLC, high-performance liquid chromatography; NMR, nuclear magnetic  
31 resonance; IE, interaction energy; REU, Rosetta energy units; SWC, soil water content.

32

### 33 **Significance Statement**

34 Diterpenoids play important roles in stress resilience and chemically mediated interactions in  
35 many plant species, including major food and bioenergy crops. Enzymes of the cytochrome P450  
36 monooxygenase family catalyze the various functional decorations of core diterpene scaffolds  
37 that determine the large diversity of biologically active diterpenoids. This study describes the  
38 identification and mechanistic analysis of an unusual group of cytochrome P450  
39 monooxygenases, CYP71Z25-29, from the bioenergy crop switchgrass (*Panicum virgatum*).  
40 These enzymes catalyze the furan ring addition directly to class II diterpene synthase products,  
41 thus bypassing the conserved pairwise reaction of class II and class I diterpene synthases in  
42 labdane diterpenoid metabolism. Insight into the distinct substrate-specificity of CYP71Z25-29  
43 offers opportunity for engineering of furanoditerpenoid bioproducts.

44

45

46

47

48

49  
50  
51  
52  
53  
54  
55  
56  
57  
58  
59  
60  
61  
62  
63  
64  
65  
66  
67  
68  
69  
70  
71

**Abstract**

Specialized diterpenoid metabolites are important mediators of stress resilience in monocot crops. A deeper understanding of how species-specific diterpenoid-metabolic pathways and functions contribute to plant chemical defenses can enable crop improvement strategies. Here, we report the genomics-enabled discovery of five cytochrome P450 monooxygenases (CYP71Z25-29) that form previously unknown furanoditerpenoids in the monocot bioenergy crop switchgrass (*Panicum virgatum*). Combinatorial pathway reconstruction showed that CYP71Z25-29 catalyze furan ring addition to diterpene alcohol intermediates derived from distinct class II diterpene synthases, thus bypassing the canonical role of class I diterpene synthases in plant diterpenoid metabolism. Transcriptional co-expression patterns and presence of select diterpenoids in droughted switchgrass roots support possible roles of CYP71Z25-29 in abiotic stress responses. Integrating molecular dynamics, structural analysis, and targeted mutagenesis, identified active site determinants controlling distinct CYP71Z25-29 catalytic specificities and, combined with broad substrate promiscuity for native and non-native diterpenoids, highlights the potential of these P450s for natural product engineering.

72

73

74

75 **Introduction**

76 Diverse networks of specialized metabolites impact plant fitness by mediating ecological  
77 interactions among plants, microbes and animals. Among these metabolites, diterpenoids play  
78 essential roles in plant defense and ecological adaptation (Tholl, 2015). For instance, chemically  
79 distinct diterpenoid blends confer pathogen and pest resistance in major global grain crops,  
80 including maize (*Zea mays*) and rice (*Oryza sativa*) (Schmelz et al., 2014; Murphy and Zerbe,  
81 2020). Recent studies further suggest diterpenoid functions in mediating abiotic stress  
82 adaptation. For example, UV irradiation elicited diterpenoid accumulation and expression of the  
83 corresponding metabolic genes in rice (Park et al., 2013; Horie et al., 2015). Inducible  
84 diterpenoid formation was also observed in maize in response to oxidative, drought and salinity  
85 stress (Vaughan et al., 2014; Christensen et al., 2018; Mafu et al., 2018), and diterpenoid-  
86 deficient maize mutants show decreased resilience to abiotic perturbations (Vaughan et al.,  
87 2015). Expanding knowledge of diterpenoid diversity, associated metabolic pathways and  
88 functions across a broader range of monocot crop species can inform adaptive breeding and  
89 engineering strategies to improve crop environmental resilience (Bevan et al., 2017; Nelson et  
90 al., 2018; Bailey-Serres et al., 2019).

91 Switchgrass (*Panicum virgatum*) is a key species of the North American tallgrass prairie  
92 ecosystem and valued as a forage and biofuel crop for its high net energy yield and abiotic stress  
93 tolerance (Schmer et al., 2008; Liu et al., 2015; Lovell et al., 2021). Broad drought-induced  
94 alterations in carbohydrate, lipid, phenylpropanoid and terpenoid metabolism support a role of

95 specialized metabolites in switchgrass abiotic stress resilience (Xingxing Li; Meyer et al., 2014;  
96 Pelot et al., 2018; Muchlinski et al., 2019).

97

98 Diterpenoids in monocot crops almost invariably belong to the group of labdane-type  
99 metabolites, and feature species-specific structures, bioactivities, and spatiotemporal regulation  
100 and distribution (Schmelz et al., 2014; Murphy and Zerbe, 2020). Diterpene synthases (diTPS)  
101 and cytochrome P450 monooxygenases (P450) are the key gatekeepers to diterpenoid diversity  
102 (Zerbe and Bohlmann, 2015; Banerjee and Hamberger, 2018). Rooted in the common C20  
103 precursor, geranylgeranyl pyrophosphate (GGPP), the conserved pathway architecture en route  
104 to labdane diterpenoids recruits the combined activity of class II and class I diTPSs. After class  
105 II diTPS catalyzed conversion of GGPP into bicyclic prenyl pyrophosphate compounds of  
106 distinct stereochemistry and oxygenation, class I diTPSs facilitate the dephosphorylation and  
107 subsequent cyclization and/or rearrangement of these intermediates to generate various  
108 diterpenoid scaffolds (Peters, 2010). Functional decoration through the activity of P450s and  
109 other modifying enzyme classes then expands the structural complexity and bioactivity of plant  
110 diterpenoids (Banerjee and Hamberger, 2018). Over the past decades, numerous diterpenoid-  
111 metabolic diTPSs and P450s have been identified in maize, rice and wheat (*Triticum aestivum*)  
112 (reviewed in Schmelz et al., 2014; Murphy and Zerbe, 2020), and demonstrated that downstream  
113 of the central GGPP precursor, labdane diterpenoid biosynthesis is organized as modular  
114 metabolic networks, where pairwise reactions of functionally distinct enzymes create multiple  
115 pathway branches to readily increase product diversity (Xu et al., 2007; Morrone et al., 2011;  
116 Mafu et al., 2018; Murphy et al., 2018; Ding et al., 2019). By integrating genome-wide pathway  
117 discovery and combinatorial protein biochemical tools, our prior work identified a large and

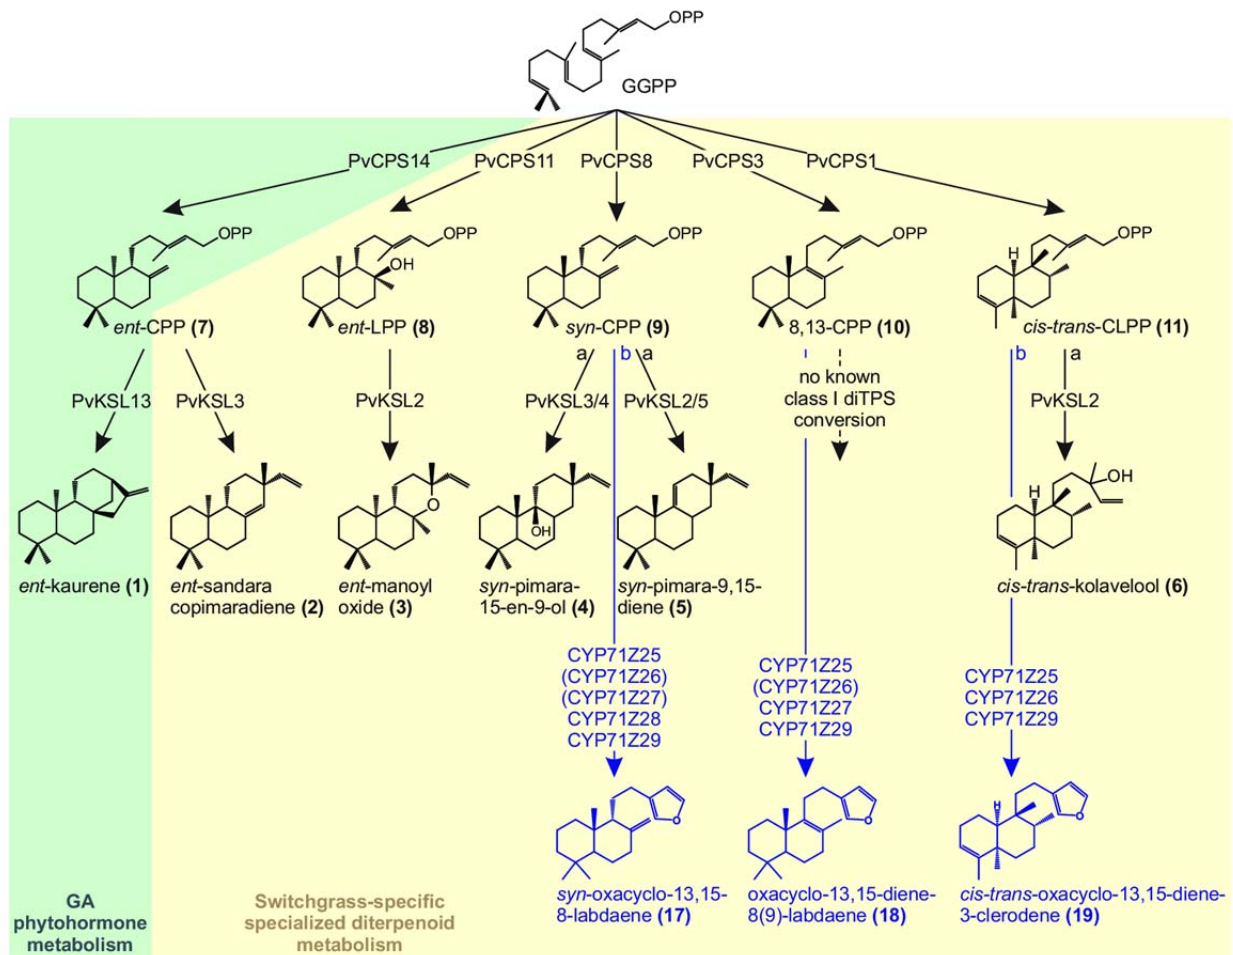

**Figure 1.** Switchgrass diterpenoid-metabolic network. Shown is an overview of identified biosynthetic pathways, involving monofunctional class II and class I diTPSs, as well as P450 enzymes (this study) that convert the central precursor GGPP into a range of diterpenoid metabolites with putative roles in general (gibberellin phytohormone; green) and specialized (yellow) diterpenoid metabolism.

118 diverse diTPS family in switchgrass (*Panicum virgatum*) (Pelot et al., 2018) that yields an  
 119 expansive diversity of diterpenoids, including several labdane-type compounds that occur, to  
 120 current knowledge, uniquely in switchgrass (Pelot et al., 2018) (Fig. 1). Endogenous  
 121 accumulation of several metabolites and expression of the corresponding biosynthetic genes in  
 122 roots and leaves following abiotic stress support a role of terpenoids in switchgrass  
 123 environmental adaptation (Pelot et al., 2018; Muchlinski et al., 2019); however, complete  
 124 metabolic pathways, products, and their physiological functions remain to be resolved.

125 Combining genomic studies, combinatorial enzyme assays, metabolite and transcript  
126 profiling, and protein structure-function studies revealed a group of five P450s of the CYP71  
127 clan (CYP71Z25-29) that convert a range of diterpene scaffolds into furanoditerpenoid  
128 derivatives. P450-catalyzed addition of a furan ring directly to diterpene alcohol intermediates  
129 derived from class II diTPS activity illustrates a previously unrecognized alternative to the  
130 common labdane diterpenoid formation requiring pairwise class II and class I diTPS activity. Co-  
131 expression of functionally compatible *diTPSs* and *P450s* in switchgrass roots and drought-  
132 elicited accumulation of select diterpenoids support a role in abiotic stress responses.  
133 Mechanistic insight into CYP71Z25-29 catalysis enables resources for engineering a broad range  
134 of bioactive furanoditerpenoids.

135

136

## 137 **Results**

### 138 **Identification of diterpenoid-metabolic P450s in the switchgrass genome**

139 To elucidate P450 pathways for the functional decoration of the expansive spectrum of  
140 diterpenoid structures in switchgrass, we probed the genomic regions neighboring known  
141 switchgrass *diTPS* genes (*P. virgatum*; var. Alamo AP13; genome version v5.1) (Lovell et al.,  
142 2021, Pelot et al., 2018). A tandem pair of two *P450* genes, designated *CYP71Z26*  
143 (*Pavir.IKG382300*) and *CYP71Z27* (*Pavir.IKG382400*), co-localized on chromosome 1K in  
144 direct proximity to three class II *diTPS* genes, including the *cis-trans*-clerodienyl pyrophosphate  
145 (*cis-trans*-CLPP) synthase *PvCPS1* (*Pavir.IKG382200*) (12.5 kb and 43.5 kb, respectively), its  
146 paralog *PvCPS2* (*Pavir.IKG382115*), and an additional putative *diTPS* (*Pavir.IKG382110*) (Fig.  
147 2A). An additional P450 candidate, *CYP71Z25* (*Pavir.IKG341400*), was identified distantly (1.3  
148 Mb from *CYP71Z27*) on chromosome 1K. Orthology networks including the genomes of  
149 switchgrass, the diploid switchgrass relative *P. hallii* (DOE-JGI) (Lovell et al., 2018), and  
150 *Setaria italica* (Bennetzen et al., 2012) identified five additional switchgrass P450s, while only  
151 one in *S. italica* and two possible paralogs in *P. hallii* were observed (Fig. S1). Notably, the  
152 paralogs, *Pahal.A02218* and *Pahal.A02220*, were also clustered in the genome of *P. hallii* (var.  
153 filipes FIL2; version v2.0) (Lovell et al., 2018) and co-localized with two class II diTPSs,  
154 *Pahal.A02215* and *Pahal.A02217*, with predicted *cis-trans*-CLPP and 8,13-CPP synthase  
155 activities, respectively (Pelot et al., 2018) (Fig. 2B). Among the remaining identified switchgrass  
156 candidates, only two, *CYP71Z28* (*Pavir.ING304500*) and *CYP71Z29* (*Pavir.ING309700*),  
157 represented full-length open reading frames and are located distantly (~552 kb) from each other  
158 on chromosome 1N (Fig. 2A). *CYP71Z25-29* showed high protein sequence identity (90-99%)  
159 among the five switchgrass proteins and 82-91% to the two *P. hallii* homologs (Fig. 2C, Fig. S1).



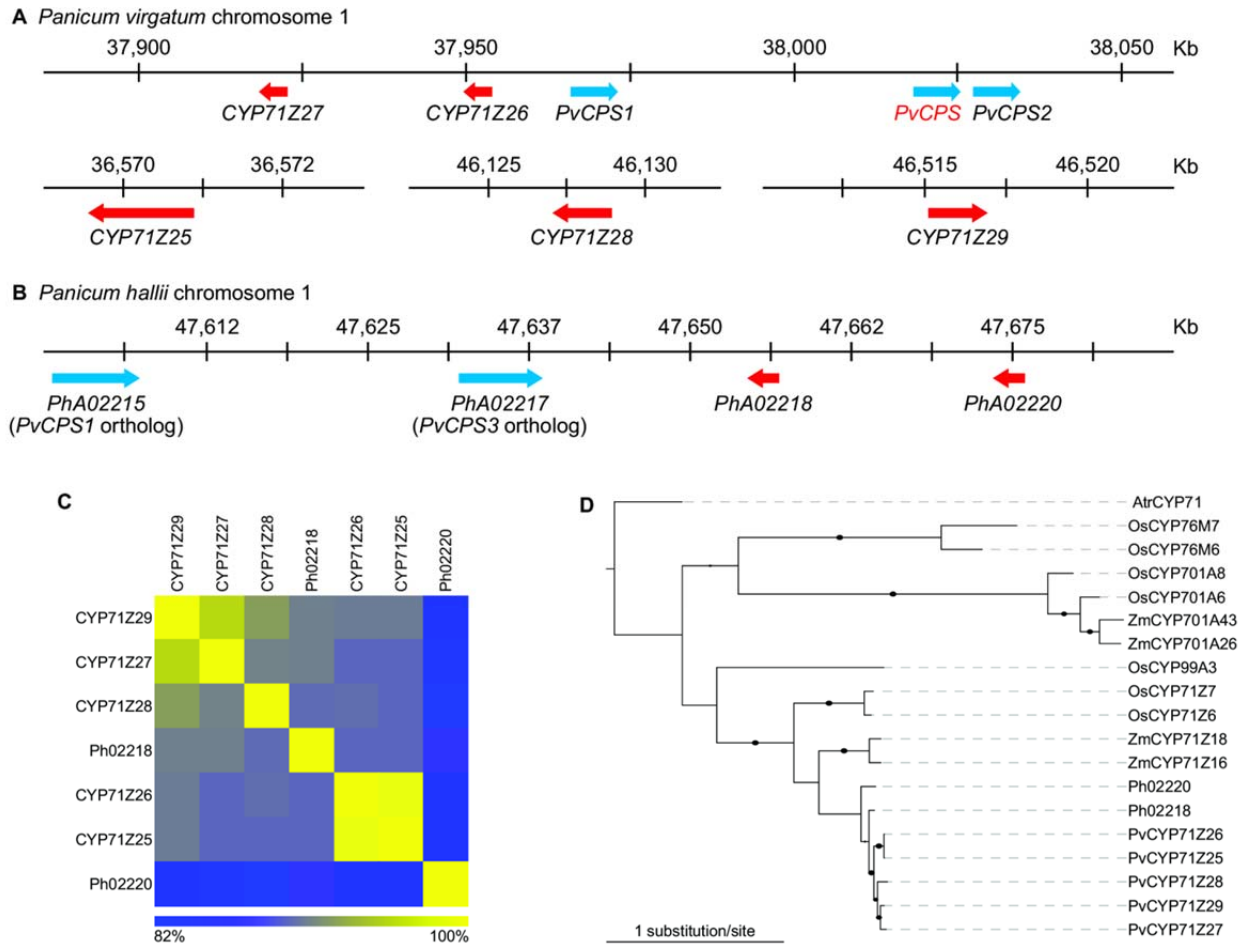

**Figure 2.** Discovery of switchgrass (*Panicum virgatum*) cytochrome P450 monooxygenases. (A-B) Genomic collocation of P450 genes (red) with class II diterpene synthases (blue) in the *P. virgatum* (var. Alamo AP13) genome (version v5.1) and the genome of the diploid switchgrass relative *P. hallii* (var. filipes FIL2, version v3.1) (DOE-JGI(b); Lovell et al., 2018). (C) Heat map illustrating the amino acid sequence identity of the five identified switchgrass P450 candidates, CYP71Z25-29, and orthologous P450s from the diploid switchgrass relative *P. hallii*. (D) Maximum-likelihood phylogenetic tree of CYP71Z25-29 with predicted or characterized diterpenoid-metabolic P450s from other monocot crops (Table S4). Tree rooted with the uncharacterized CYP71 from *Amborella trichopoda*. Branches with bootstrap support greater than 80% (500 repetitions) are depicted by black circles.

160 Phylogenetic analysis with characterized diterpenoid-metabolic P450s from related Poaceae  
 161 species placed the switchgrass proteins in a distinct clade together with the *P. hallii* (Fig. 2D).  
 162 This branch showed the closest relationship with members of the CYP71 clan with known roles  
 163 in specialized diterpenoid metabolism in maize and rice (Wu et al., 2011; Mao et al., 2016; Mafu  
 164 et al., 2018; Ding et al., 2019), thus indicating related, yet distinct functionalities.

165

## 166 Switchgrass CYP71Z enzymes form distinct furanoditerpenoids

167 To functionally characterize the identified switchgrass P450s (CYP71Z25-29), we employed  
168 combinatorial pathway reconstruction assays of codon-optimized, N-terminally modified P450  
169 constructs with functionally distinct diTPSs and a maize cytochrome P450 reductase (*ZmCPR2*)  
170 using an established *E. coli* expression platform (Morrone et al., 2010; Murphy et al., 2019).  
171 Following the typical pathway organization of plant labdane diterpenoid metabolism (Peters,  
172 2010), we first tested the co-expression of each P450 with different pairs of class II and class I  
173 diTPSs that produce six core diterpenoid scaffolds formed by the switchgrass diTPS family  
174 (Pelot et al., 2018), namely *ent*-kaurene **1** (derived from *ent*-copalyl pyrophosphate, CPP **7**), *ent*-  
175 sandaracopimaradiene **2** (derived from **7**), *ent*-manoyl oxide **3** (derived from *ent*-labdadienol  
176 pyrophosphate, LPP **8**), *syn*-pimara-15-en-9-ol **4** (derived from *syn*-CPP **9**), *syn*-pimara-9,15-  
177 diene **5** (derived from **9**), and *cis-trans*-kolavelool **6** (derived from *cis-trans*-clerodienyl  
178 pyrophosphate, CLPP **11**). For compound numbering and structures see Fig. 1 & Fig. S2. When  
179 compared to the products of the combined class II and class I diTPS activity alone, trace amounts  
180 of P450 products were detected only for CYP71Z25, CYP71Z26, and CYP71Z29 when co-  
181 expressed with *PvCPS1* and *PvKSL2* that form **11** and **6**, respectively (Fig. 3A; Fig. S3). The  
182 respective P450 products featured near identical fragmentation patterns with characteristic mass  
183 ions of *m/z* 286, 191, 177, 95, and 81, indicative of an oxygenated labdane scaffold. Notably,  
184 presence of these P450 products when co-expressed with *PvCPS1* and *PvKSL2* coincided with  
185 this diTPS pair yielding the lowest product formation of all tested diTPS combinations, resulting  
186 in a higher accumulation of the dephosphorylated *cis-trans*-CLPP 15-hydroxy derivative *cis*-  
187 *trans*-kolavenol **16**, due to the activity of endogenous *E. coli* phosphatases.

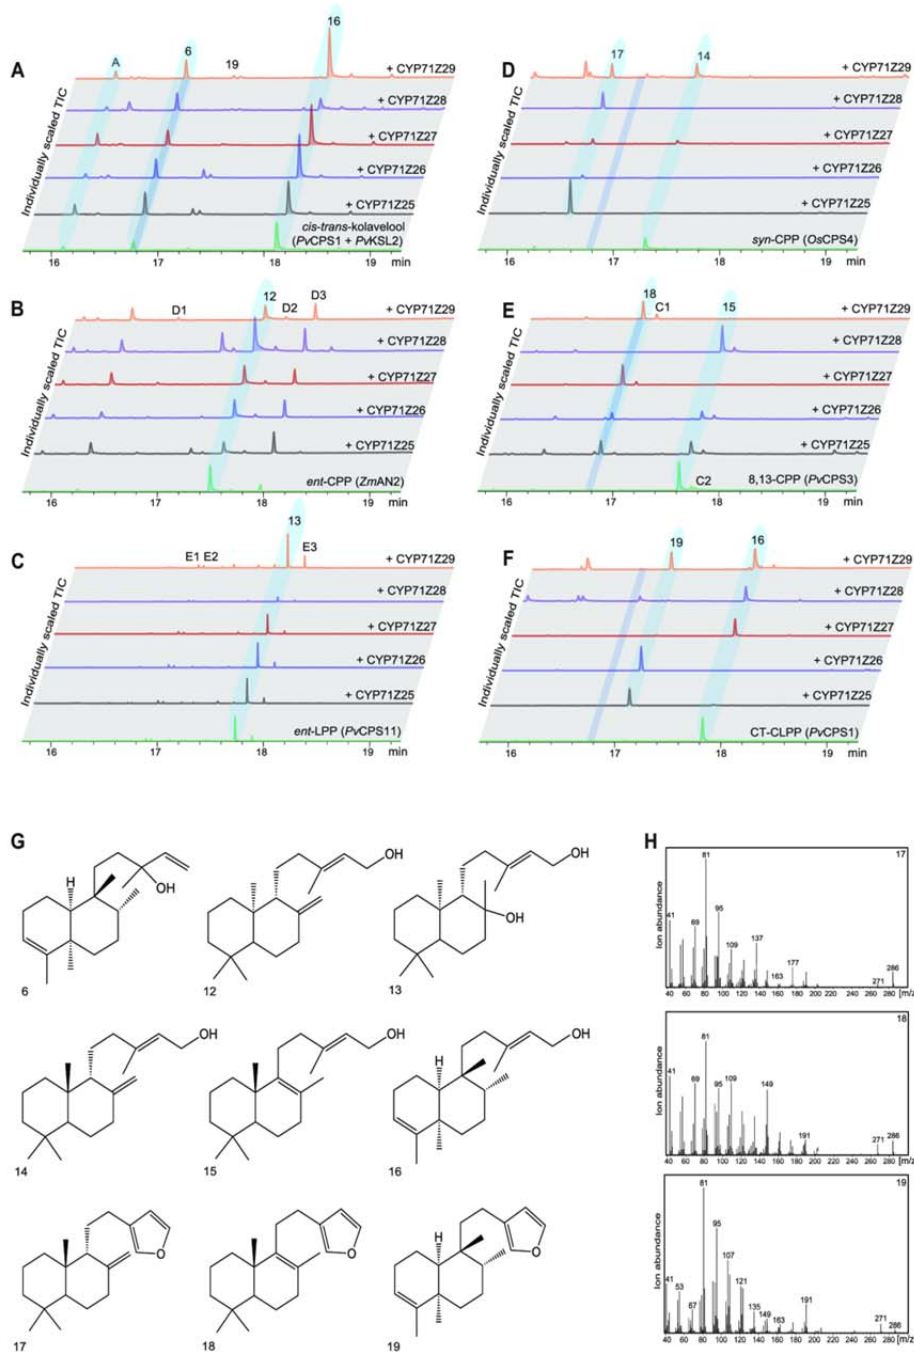

**Figure 3.** Functional characterization of switchgrass CYP71Z25-29. (A-F) Individually scaled total ion GC-MS chromatograms of enzyme products resulting from *E. coli* co-expression of each P450 candidate (CYP71Z25-29) with different diterpene synthases: (A) PvCPS1 and PvKSL2 producing the diterpenoid scaffold *cis-trans-kolavolool* **6**, (B) ZmAN2 producing *ent-labdadienyl pyrophosphate* (LPP) **8**, (C) PvCPS11 producing *ent-labdadienyl pyrophosphate* (LPP) **8**, (D) *Oryza sativa* CPS4 producing *syn-CPP* **9**, (E) PvCPS3 producing 8,13-CPP **10**, and (F) PvCPS1 producing *cis-trans-clerodienyl pyrophosphate* (CT-CLPP) **11**. Compounds labeled as C1-2, D1-3 and E1-3 indicate unidentified terpenoid products based on mass spectral patterns. Unlabeled peaks represent non-terpenoid compounds derived from *E. coli* expression cultures. (G) Structures of relevant enzyme products. Structures of **17**, **18**, and **19** were verified by NMR analysis and absolute stereochemistry assigned based on the corresponding class II diterpene synthase products. (H) Mass spectra of identified P450 furanoditerpenoid products.

189 *PvCPS1* or *PvCPS2*, supported the hypothesis that CYP71Z25-29 function in combination with  
190 only class II diTPSs. To test this hypothesis, *E. coli* co-expression assays were conducted pairing  
191 each P450 candidate with individual class II diTPSs producing the distinct prenyl pyrophosphate  
192 products known in switchgrass: **7**, **8**, **9**, **11** and 8,13-CPP **10** (Pelot et al., 2018) (Fig. S2). GC-  
193 MS analysis of the respective reaction products showed product formation by all P450s, although  
194 with apparent differences in substrate specificity (Fig. 3B-F). It should be noted that GC-MS  
195 analysis detected the dephosphorylated class II diTPS products due to the activity of endogenous  
196 *E. coli* phosphatases (*ent*-copalol **12**, *ent*-labdadienol **13**, *syn*-copalol **14**, 8,13-copalol **15**, and  
197 *cis-trans*-kolavenol **16**. No P450 products were observed with **12** or **13** as substrates (Fig. 3B-C).  
198 Conversion of **16** was observed for CYP71Z25, CYP71Z26 and CYP71Z29, whereas CYP71Z27  
199 and CYP71Z28 showed no activity. Importantly, the resulting P450 product featured the same  
200 retention time and a near-identical fragmentation pattern as compared to the product observed  
201 when combining the *cis-trans*-CLPP (**11**) synthase *PvCPS1* with the *cis-trans*-kolavelool **6**  
202 synthase *PvKSL2* and a P450 candidate (Fig. 3A,F). Conversion of **15** was observed for  
203 CYP71Z27, CYP71Z29, and partially for CYP71Z25 and CYP71Z26, whereas CYP71Z28 was  
204 largely inactive with this substrate (Fig. 3E). By contrast, CYP71Z28 showed high activity with  
205 **14** as a substrate, as did CYP71Z25 and CYP71Z26, whereas CYP71Z27 and CYP71Z29  
206 showed only incomplete substrate conversion (Fig. 3D). For all observed P450 products,  
207 fragmentation patterns featured *m/z* 286, 191, and 177 mass ions consistent with oxygenated  
208 labdane diterpenoid structures (Fig. 3G-H).

209 To determine the structure of selected P450 products, enzymatically produced and purified  
210 compounds were subject to 1D and 2D NMR (HSQC, COSY, HMBC and NOESY) analysis and  
211 compared to previously reported NMR data where available. This approach revealed a shared

212 structural scaffold of the P450 products that contains the individual class II diTPS-derived  
213 diterpene backbones with a furan ring addition at the C15-C16 position (Fig. 3G).  
214 Furanoditerpenoid products identified here included *syn*-15,16-epoxy-8(17),13(16),14-triene **17**  
215 derived from the *PvCPS8* product **14** (Fig. S4), 15,16-epoxy-8,13(16),14-triene **18** derived from  
216 the *PvCPS3* product **15** (Fig. S5), and *cis-trans*-15,16-epoxy-cleroda-3,13(16),14-triene **19**  
217 derived from the *PvCPS1* product **16** (Fig. S6). The stereochemistry of the P450 products was  
218 assigned on the basis of the respective class II diTPS products (Pelot et al., 2018).

219 Considering the substrate promiscuity of CYP71Z25-29, we next investigated the capacity  
220 of these P450s to convert alternate class II diTPS products. Indeed, with the exception of  
221 CYP71Z28, all P450s formed (+)-15,16epoxy-8(17),13(16),14-triene **26** when co-expressed with  
222 a diTPS producing (+)-CPP **20** ((+)-copalol **23**), a class II diTPS product not currently known in  
223 switchgrass, but formed by diTPSs of other monocot crops such as wheat and maize (Wu et al.,  
224 2012; Murphy et al., 2018) (Figs. S7 and S8). In addition, CYP71Z25 and CYP71Z26 showed,  
225 albeit low, activity when co-expressed with the *trans-cis*-neo-clerodienyl pyrophosphate (*trans-*  
226 *cis*-CLPP **22**; *trans-cis*-kolavenol **25**) synthase of *Salvia divinorum*, *SdCPS2* (Pelot et al., 2017),  
227 forming the core precursor to salvinorin A, a neoclerodane furanoditerpenoid with potential use  
228 for the treatment of drug addiction and neuropsychiatric disorders (Kivell et al., 2014). The two  
229 major P450 products showed signature mass ions of  $m/z$  286 or  $m/z$  288, indicating a **25**-derived  
230 furanoditerpenoid **28** and *trans-cis*-cleroda-3,12-dien-15,16-diol **29** structures, respectively (Fig.  
231 S7).

232 Formation of furanoditerpenoids through the coupled activity of the focal P450s and  
233 functionally distinct class II diTPSs warranted a deeper investigation of the nature of the P450  
234 substrate. While class II diTPSs form prenyl pyrophosphate products with a characteristic

235 pyrophosphate group at C15 (Peters, 2010), as mentioned above, expression of class II diTPSs in  
236 heterologous plant or microbial host systems typically yields the corresponding C15-hydroxy  
237 derivatives formed through the activity of endogenous phosphatases (Mafu et al., 2018; Pelot et  
238 al., 2018; Ding et al., 2019). To clarify the catalytic preference of CYP71Z25-29, substrate  
239 feeding experiments were conducted by adding enzymatically produced and purified compounds  
240 of **15** or **16** to *E. coli* cultures expressing CYP71Z25 or CYP71Z29. For both tested P450-  
241 substrate combinations, conversion of the 15-hydroxy diterpene substrates into the respective  
242 furanoditerpenoids was observed, whereas no conversion was detected in control samples  
243 expressing plasmids carrying *ZmCPR2* alone (Fig. S9). Substantial limitations in purifying the  
244 corresponding prenyl pyrophosphate compounds prevented the possibility to conduct  
245 complementary feeding assays within the scope of this study.

246

#### 247 ***Structure-guided mutagenesis identifies active site determinants of P450 catalytic specificity***

248 To investigate the catalytic mechanism underlying the unusual activity of CYP71Z25-29,  
249 homology models were generated for each P450 using the recently reported crystal structure of  
250 *Salvia miltiorrhiza* CYP76AH1 (Gu et al., 2019) as a template. Given a protein identity of only ~  
251 42% to the target P450s (Fig. S10), an iterative homology modeling and energy minimization  
252 approach employing relaxed template protein structures (Nivón et al., 2013; Pei and Grishin,  
253 2014) was used to generate high-quality models. The resulting lowest energy model was used for  
254 ligand docking of the heme co-factor into the individual active sites. The generated structural  
255 models showed root-mean-square deviation (RMSD) values of 0.67-0.75 as compared to the  
256 template, thus representing high-quality reproduction of common secondary structures and  
257 placement of active site residues as demonstrated, for example, for the heme-anchoring cysteine

258 C421 (Fig. S10). The five diterpenoid substrates tested in this study were then docked into the  
259 heme-model complex with three conceivable substitution arrangements: 15-hydroxy and 15-  
260 pyrophosphate structures as alternate substrates and 15,16-dihydroxy derivatives as intermediate  
261 or product of the P450-catalyzed oxygenation reaction (Figs. S2 and S10). Comparison of the  
262 interaction energy (IE) of all generated substrate-P450 docking poses showed that the average IE  
263 was most favorable for the 15-hydroxy and 15-16-dihydroxy substrates, whereas the 15-  
264 pyrophosphate structure was energetically less favorable (Table S1). The difference in IE  
265 between the 15-hydroxy and 15-pyrophosphate ligands can presumably be attributed to the far  
266 larger volume and electrostatic charge of the pyrophosphate moiety.

267 The various modeled substrate-protein complexes were then used to investigate active site  
268 residues with possible impact on the distinct substrate specificity of CYP71Z25-29. A total of 15  
269 active site residues associated with the six known CYP71 substrate recognition sites (SRS)  
270 (Dueholm et al., 2015) were identified that were located proximal to the docked substrates and  
271 showed residue variation among CYP71Z25-29 and related members of the CYP71Z subfamily  
272 (Fig. 4A). To investigate the catalytic impact of these residues, protein variants of CYP71Z25  
273 and CYP71Z27, as the functionally most contrasting P450s, were generated via site-directed  
274 mutagenesis and functionally characterized by *E. coli* co-expression with individual class II  
275 diTPSs producing native (**14**, **15**, **16**) or non-native (**23**, **24**, **25**) P450 substrates. Reciprocal  
276 mutagenesis of all 15 identified residues between CYP71Z25 and CYP71Z27 (F/Y81, F/S86,  
277 V/I89, N/D95, S/T187, L/Q188, A/G215, V/Y218, R/Q220, V/L226, E/D283, T/I288, L/M293,  
278 S/T346, M/I463) resulted in a near-complete loss of function of the corresponding CYP71Z25  
279 variant (Fig. 4B, Fig. S10). By contrast, the reciprocal multi-residue variant of CYP71Z27  
280 featured an altered product profile largely reflecting the wild type products of CYP71Z25.

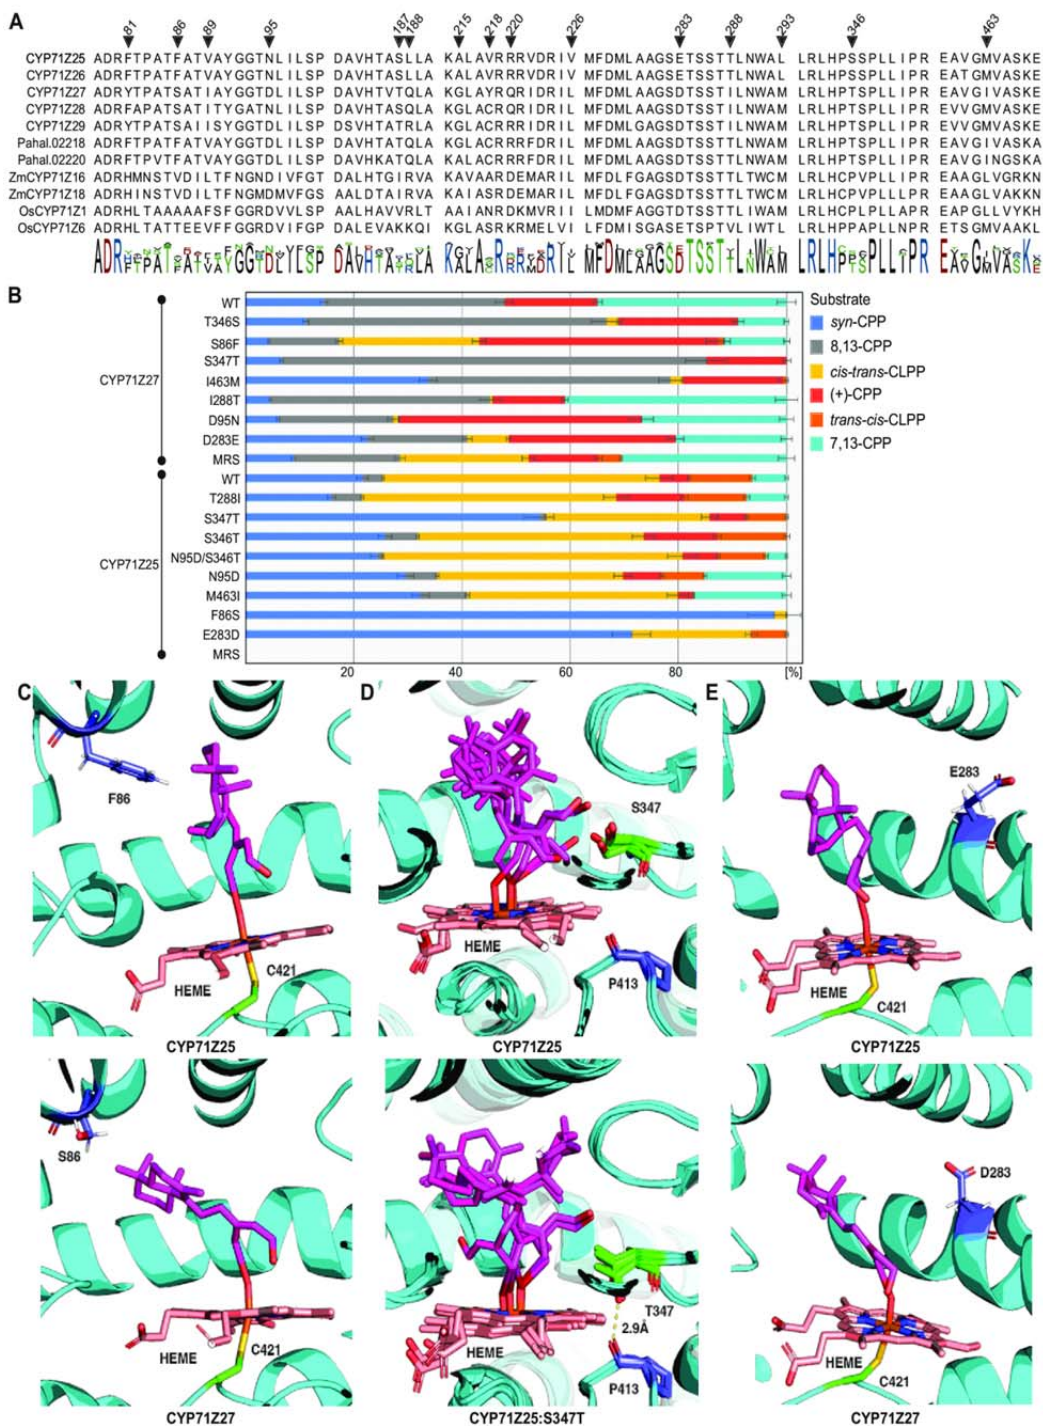

**Figure 4.** (A) Protein sequence alignment of Substrate Recognition Site (SRS) motifs of CYP71Z25-29 and related members of the CYP71Z subfamily of known or predicted function. (B) Analysis of standardized substrate conversion by CYP71Z25 and CYP71Z27 SDM variants. *E. coli* co-expressions for each variant with native (14, 15, 16) and non-native (23, 24, 25) switchgrass substrates were carried out in triplicate and normalized to the internal standard 1-eicosane and the OD600 at time of induction of protein expression. Error bars indicate standard deviation of replicates from the mean. (C) Active sites of CYP71Z25 (right) and CYP71Z27 (left) with heme (magenta), substrate (pink), and residues C412 (green) and S/F86 (blue). (D) Structural overlay of the five lowest IE active sites of CYP71Z25 (left) and CYP71Z25-S347T variant (right) with 15 (8,13-copalol) substrate (pink) and heme (magenta) docked. Residues S/T347 (green), P413 (blue), and corresponding hydrogen bonding (yellow dashes) with distance in Ångstrom are highlighted. (E) Active sites of CYP71Z25 (right) and CYP71Z27 (left) with heme (magenta), substrate (pink), and residues C412 (green) and E/D283 (blue).

281 Strikingly, the single residue variant CYP71Z27:S86F showed a product profile similar to that



282 observed for the multi-residue variant of CYP71Z27, converting all six tested diterpene alcohol  
283 substrates (Fig. 4B,C). By contrast, the reciprocal CYP71Z25:F86S variant showed only trace  
284 product amounts, again comparable to the multi-residue variant of CYP71Z25. Most notably,  
285 this protein variant showed substantial activity in producing **19** making up  $23.7\pm 0.6\%$  of the  
286 product profile. Analysis of additional single residue variants revealed S347 hydrogen bonds  
287 with the docked hydroxy substrates and is conserved in CYP71Z25-29 (Fig. 4A,D). Substitution  
288 of S347 for a Thr impaired enzyme activity in CYP71Z27 with the exception of the conversion  
289 of 8,13-CPP-derived diterpene alcohols, whereas the same mutation had a lesser impact on  
290 CYP71Z25 catalysis reducing predominantly the conversion of **15** by 2.6% and **24** by 6.4% (Fig.  
291 4B). Consistent with the observed protein variant activities, docking of the **15**-derived substrate  
292 into the active site crevice of CYP71Z25 and the corresponding S347T variant suggests that  
293 exchange of the native S347 residue to a Thr results in hydrogen bond formation with a  
294 neighboring Pro residue (P413), rather than the hydrogen bond formed with the substrate in the  
295 wild type enzymes (Fig. 4D). Reciprocal exchange of residues E/D283 significantly reduced  
296 product formation in CYP71Z25, especially with regards to the conversion of **15**, **23**, **24** (Fig.  
297 4B,E), whereas the corresponding variant CYP71Z27:D283E showed only minor product  
298 changes with **19** as an additional product contributing  $7.7\pm 0.1\%$  to the profile.

299 Mutagenesis of the remaining selected residues in CYP71Z25 and CYP71Z27, namely  
300 N/D95, T/I288, S/T346 and M/I463, showed limited impact on P450 catalytic specificity,  
301 including the formation of **19** as a product absent in the wild type enzyme by the  
302 CYP71Z27:D95N and CYP71Z27:T346S variants. Furthermore, the CYP71Z25:T288I variant  
303 and an additional double mutation, CYP71Z25:N95D/S346T showed a 9% increase in producing  
304 **28** when co-expressed with the *trans-cis*-CLPP synthase *SdCPS2* (Fig. S4).

305

306 ***P450-derived furanoditerpenoids show drought-elicited formation in switchgrass roots***

307 Previous work demonstrated that select diTPS transcripts and corresponding enzyme  
308 products, including **3** and **4**, accumulate in switchgrass (Alamo) leaves and roots exposed to  
309 below-ground oxidative stress (Pelot et al., 2018). To determine if furanoditerpenoid  
310 biosynthesis follows similar patterns, we examined P450-derived furanoditerpenoids in  
311 switchgrass plants exposed to four weeks of drought stress. Targeted GC-MS metabolite  
312 profiling of organic solvent extracts of droughted switchgrass roots and well-watered control  
313 plants illustrated an, albeit moderate, accumulation of several diterpenoid compounds, including  
314 **4**, a yet unidentified diterpenoid, and two metabolites, **30** and **31**, that show mass fragmentation  
315 patterns significantly similar but distinct from the identified furanoditerpenoid P450 products,  
316 suggesting that these compounds may represent further functionalized derivatives (Fig. 5A&B,  
317 Fig. S11). Specifically, mass ions of  $m/z$  177 and  $m/z$  192 indicated a *syn*-labdane backbone of  
318 compound **30**. Compound **31** featured a prominent  $m/z$  148 possibly indicating an 8,13-labdane  
319 scaffold, as well as a  $m/z$  304 mass fragment suggesting that this compound carries an additional  
320 hydroxy group (Fig. 5B). Low abundance of the identified diterpenoids prevented their  
321 purification from plant material for structural verification. Notably, all identified diterpenoids  
322 were present in both droughted and control plants with only compound **31** showing a moderate  
323 accumulation during the course of the drought treatment (Fig. S11).

324 Additional differential gene expression analysis using the same tissue samples was used to  
325 assess *diTPS* and *P450* gene expression patterns in droughted and control leaf and root tissue  
326 (Fig. 5B). Gene expression of *CYP71Z25-29* and the majority of diterpenoid-metabolic diTPSs,  
327 including the *cis-trans*-CLPP synthase *PvCPSI*, the predicted *syn*-CPP synthases *PvCPS9* and

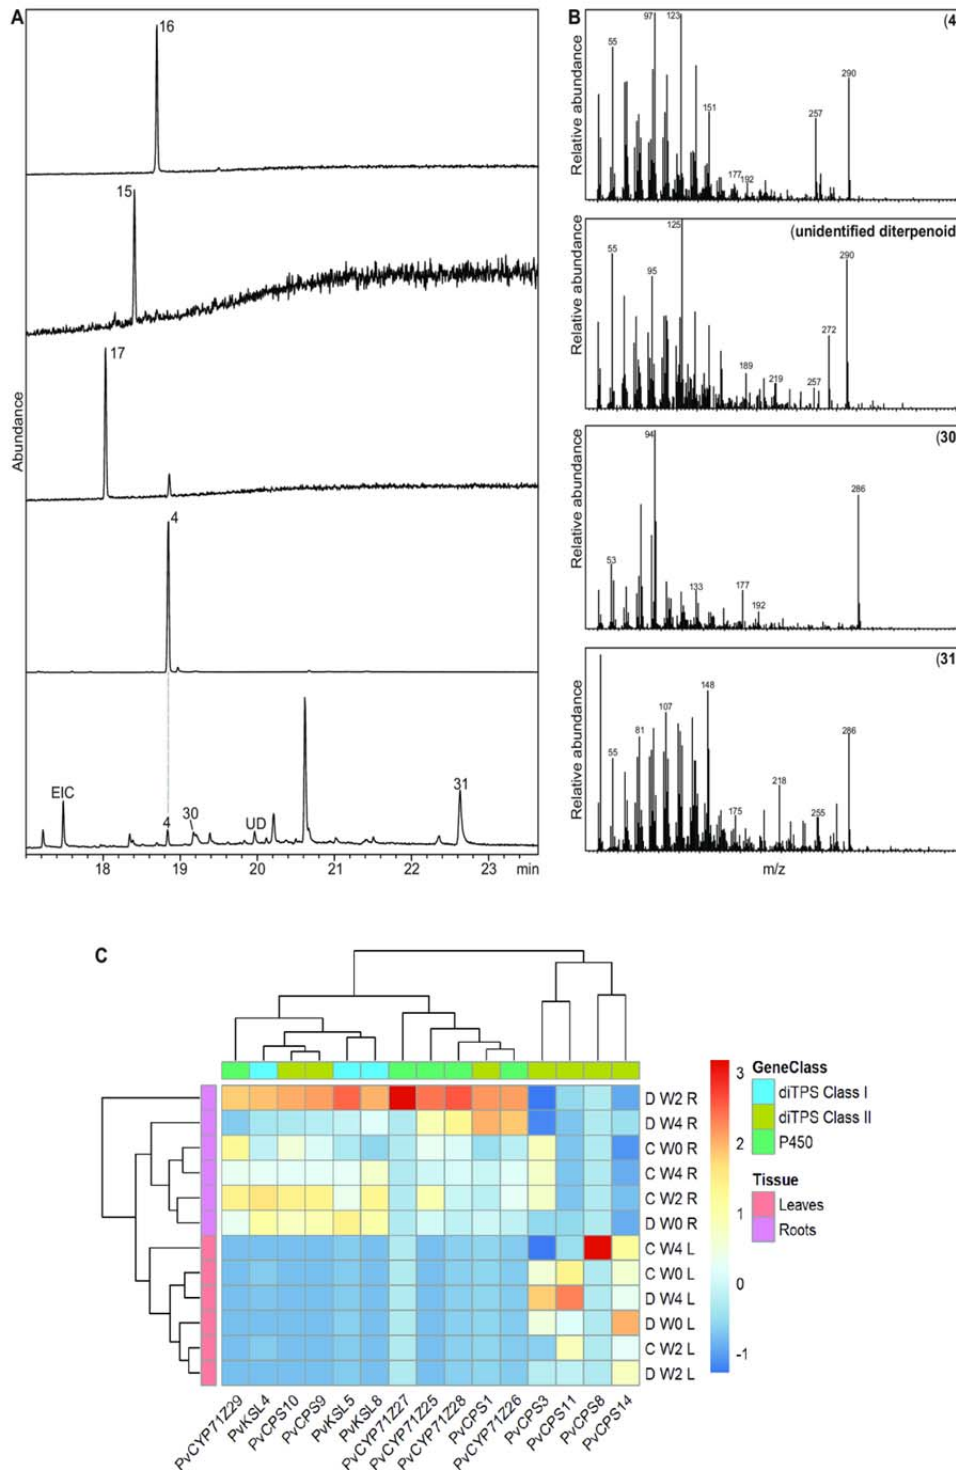

**Figure 5.** GC-MS total ion chromatograms (**A**) and mass spectra (**B**) of diterpenoids detected in organic solvent extracts of switchgrass roots identified diterpenoids 4, an unidentified diterpenoid (UD) and predicted furanoditerpenoids (compounds 30 and 31) as possible derivatives of products of CYP71Z25-29. (**C**) Hierarchical cluster analysis of select diTPS and CYP71Z25-29 gene expression profiles from drought stressed tissues. Samples were collected before starting treatment (W0), two weeks (W2), and four weeks (W4) of drought stress treatment. L=leaves, R=roots, Drought stressed=D, well-watered=C.

329 only in roots consistent with the presence of compound **4** and predicted furanoditerpenoids. By  
330 contrast, the 8,13-CPP (**10**) synthase *PvCPS3* was moderately expressed in both organs, whereas  
331 the *ent*-LPP (**8**) synthase *PvCPS11* and the putatively gibberellin-biosynthetic *ent*-CPP (**7**)  
332 synthase *PvCPS14* were expressed only in leaves. Distinct from its homologs, *PvCPS9* and  
333 *PvCPS10*, the *syn*-CPP (**9**) synthase *PvCPS8* was expressed only in leaves after four weeks of  
334 treatment in well-watered plants, suggesting an expression profile at only later developmental  
335 stages. Drought-induced gene expression of root-specific specialized *diTPSs* and *CYP71Z25-29*  
336 was observed to be moderate with an increase until two weeks of drought treatment, followed by  
337 a decreased transcript abundance at four weeks of treatment (Fig. 5B). In leaves, expression of  
338 the specialized class II *diTPSs* *PvCPS3* and *PvCPS11* was highest after four weeks of drought  
339 treatment, whereas *PvCPS8* showed no drought-elicited transcript accumulation.

340

341

## 342 Discussion

343 Crop improvement strategies increasingly benefit from knowledge of gene-to-metabolite  
344 relationships that contribute to desired crop traits and serve as resources for molecular crop  
345 engineering or breeding (Jez et al., 2016). Particularly, knowledge of the dynamic networks of  
346 plant specialized metabolites that enable plants to adapt to environmental pressures is needed in  
347 light of exacerbating crop losses caused by climate shifts and associated pest and disease damage  
348 (Savary et al., 2019). Diterpenoids serve as key components of biotic and abiotic stress resilience  
349 in rice and maize (Schmelz et al., 2014; Murphy and Zerbe, 2020), and stress-inducible, species-  
350 specific diterpenoid networks have also been discovered in other food and bioenergy crops such  
351 as switchgrass, foxtail millet and wheat, although their physiological functions are less well  
352 understood (Wu et al., 2012; Zhou et al., 2012; Schmelz et al., 2014; Pelot et al., 2018; Ding et  
353 al., 2019; Karunanithi et al., 2020). Prior studies identified an expansive *diTPS* gene family in  
354 allotetraploid switchgrass that forms specialized diterpenoids both common among the grass  
355 family and, to current knowledge, uniquely present in switchgrass (Pelot et al., 2018). The  
356 discovery of a group of functional *P450* genes, *CYP71Z25-29*, that function as furanoditerpenoid  
357 synthases via an alternate pathway independent of class I diTPS activity provides a deeper  
358 understanding of the divergence of switchgrass diterpenoid metabolism and how the natural  
359 modularity of diterpenoid-biosynthetic pathways drives the evolution of complex, lineage-  
360 specific blends of bioactive metabolites.

361 Identification of eight *CYP71Z*-type genes in switchgrass, as compared to only one paralog in  
362 *S. italica* and two genes in the diploid switchgrass relative *P. hallii*, suggests an expansion of this  
363 *P450* group after the split from *P. hallii* approximately 8 MYA (Lovell et al., 2021). A close  
364 phylogenetic relationship among the functional members, *CYP71Z25-29*, indicates a shared

365 evolutionary origin preceding gene duplication and sub/neo-functionalization events common in  
366 diterpenoid pathway evolution (Zi et al., 2014). Localization of *CYP71Z26* and *CYP71Z27* on  
367 chromosome 1K, along with a near-identical gene arrangement of two paralogs in *P. hallii*,  
368 whereas *CYP71Z25*, *CYP71Z28* and *CYP71Z29* are located on subgenome K, suggests that gene  
369 family expansion was associated with switchgrass subgenome expansion approximately 4.6  
370 MYA (Lovell et al., 2021).

371 Diterpenoid-forming members of the CYP71Z subfamily also exist in maize and rice, where  
372 they catalyze position-specific hydroxylation, carboxylation or epoxidation reactions in various  
373 labdane scaffolds produced by the pairwise activity of class II and class I diTPS enzymes (Wu et  
374 al., 2011; Mafu et al., 2018; Ding et al., 2019). Consistent with their phylogenetic distance from  
375 maize and rice CYP71Z enzymes, functional characterization of switchgrass CYP71Z25-29  
376 demonstrated a rare P450 activity in catalyzing the addition of a furan ring at C15-C16 of a range  
377 of different labdane scaffolds. The only known example of P450-mediated furan ring formation  
378 is the biosynthesis of the monoterpene menthofuran catalyzed by CYP71A32 in members of  
379 the *Mentha* genus (Bertea et al., 2001). Strikingly, contrasting known labdane diterpenoid  
380 pathways that invariably require the activity of class II and class I diTPSs, CYP71Z25-29  
381 showed no detectable activity in converting class I diTPS products. Instead, efficient  
382 furanoditerpenoid synthase activity of CYP71Z25-29 was observed in co-expression assays with  
383 class II diTPSs alone (Fig. 3). Feeding assays with 15-hydroxy derivatives of select class II  
384 diTPS products illustrate that these diterpene alcohols rather than the 15-pyrophosphate  
385 compounds are the preferred CYP71Z25-29 substrates. This substrate preference is further  
386 supported by molecular ligand docking studies showing favorable interaction energies for 15-  
387 hydroxy and 15,16-dihydroxy intermediates as compared to the corresponding pyrophosphate

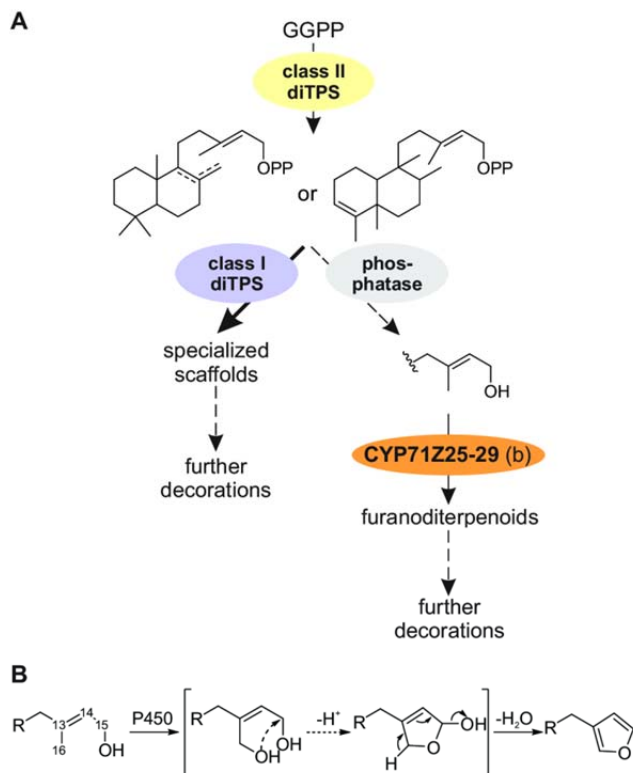

**Figure 6.** (A) Scheme of the postulated formation of diterpenoids in switchgrass. Derived from the common precursor geranylgeranyl pyrophosphate (GGPP) class II diterpene synthase products of different structure and stereochemistry can be formed either by further conversion through class I diterpene synthases and additional possible functional modifications or via cleavage of the pyrophosphate group by yet unidentified phosphatases and conversion of the resulting alcohol intermediates by CYP71Z25-29 to yield different furanoditerpenoids structures. (B) Proposed mechanism of furan ring addition catalyzed by CYP71Z25-29 that proceeds through oxidation of the C16 methyl group to form a dihydroxy intermediate, ring closure via deprotonation, and furan ring formation by dehydration.

388 structures. The observed furanoditerpenoid synthase activity of CYP71Z25-29 supports the  
 389 presence of an alternative labdane diterpenoid pathway route in switchgrass that bypasses the  
 390 common conversion of class II diTPS products by class I diTPSs and instead involves  
 391 phosphatase-mediated dephosphorylation and subsequent CYP71Z25-29-catalyzed conversion of  
 392 the resulting diterpene alcohol intermediates (Fig. 6A). Based on the conversion of the 15-  
 393 hydroxy labdane substrates by CYP71Z25-29, and similar interaction energies observed for 15-  
 394 hydroxy and 15,16 dihydroxy labdane intermediates in molecular docking analyses, a catalytic  
 395 mechanism can be proposed that proceeds through initial substrate hydroxylation at C-16 and  
 396 subsequent deprotonation and ring closure at C-15, followed by hydride shifts to facilitate

397 dehydration and formation of the C13-C16 and C14-C15 double bonds (Fig. 6B). Genomic  
398 clustering of *CYP71Z25* and *CYP71Z26/27* with the class II diTPSs *PvCPS2* and *PvCPS1*,  
399 respectively (Fig. 1A), and co-expression of furanoditerpenoid synthase genes with several class  
400 II *diTPS* (including *PvCPS1*) in switchgrass roots (Fig. 5B) further support this hypothesis.  
401 While no terpenoid-metabolic plant phosphatases have yet been described, 15-hydroxy  
402 derivatives of class II diTPS products are commonly observed in co-expression assays using  
403 microbial or *Nicotiana benthamiana* platforms (Morrone et al., 2010; Mafu et al., 2018; Pelot et  
404 al., 2018; Ding et al., 2019). Indeed, at least ten predicted acid phosphatase and lipid phosphate  
405 phosphatase genes are present in the switchgrass genome (var. Alamo AP13; version v5.1)  
406 (Lovell et al., 2021) that are located across chromosomes 1N and 1K.

407 The primary formation of class I diTPS products rather than furanoditerpenoids when co-  
408 expressing class II diTPSs, class I diTPSs and *CYP71Z25-29* may suggest that the combined  
409 activity of class II and class I diTPSs represents the dominant pathway route.  
410 Compartmentalization of plastidial class II and class I diTPSs and common P450 localization at  
411 the endoplasmic reticulum supports pairwise diTPS activity as the primary pathway. However,  
412 presence of putative furanoditerpenoids derived from the identified P450 products alongside the  
413 class I diTPS product **4** and other yet unidentified diterpenoids in switchgrass roots supports the  
414 co-occurrence of both pathway branches *in planta*. Co-expression patterns of select biosynthetic  
415 genes, including *CYP71Z25/26* as well as *PvKSL4* and *PvKSL5*, relevant for the formation of  
416 Syn-CPP-derived diterpenoids in switchgrass roots is consistent with this hypothesis. However,  
417 expression of the *syn*-CPP synthase *PvCPS8* only in leaves, may indicate that the predicted  
418 functional homologs *PvCPS9* and/or *PvCPS10* are more likely to serve in the biosynthesis of **17**  
419 and **4** in roots (Fig. 5B). Given the large size of the switchgrass diTPS family and the catalytic



420 overlap of CYP71Z25-29, future biochemical and genetic studies will be required to precisely  
421 decode the interactions governing the modular formation of switchgrass-specific diterpenoids.  
422 Interestingly, the lack of CYP71Z25-29 activity with substrates of *ent*-stereochemistry (including  
423 the GA precursor *ent*-CPP) demonstrates a dedicated role of this P450 group in specialized  
424 metabolism and highlights a biochemical separation of furanoditerpenoid and general diterpenoid  
425 metabolism in switchgrass. Similar impacts of substrate-specificity on partitioning different  
426 diterpenoid branches have recently been described in maize, where specificity of two class I  
427 diTPSs, *ZmKSL2* and *ZmKSL4*, for producing distinct positional isomers of *ent*-kaurene  
428 contributes to the partitioning of pathways toward dolabralexin and kauralexin diterpenoids  
429 (Ding et al., 2019).

430 Presence of furanoditerpenoids and other specialized diterpenoids (Fig. 5) (Pelot et al., 2018)  
431 in switchgrass roots may indicate a role in abiotic stress responses. Albeit at moderate levels,  
432 drought-induced gene expression of *CYP71Z25-28* and select *class II diTPS* in roots further  
433 supports the association of furanoditerpenoid biosynthesis and switchgrass drought stress  
434 responses. Stress-elicited accumulation of diterpenoids with allelopathic and anti-microbial  
435 bioactivities in rice roots are well-established (Schmelz et al., 2014), and recent maize studies  
436 also demonstrated the root accumulation of diterpenoid dolabralexins and sesquiterpenoid  
437 zealexins in response to drought, oxidative and salinity stress (Schmelz et al., 2014; Vaughan et  
438 al., 2015; Christensen et al., 2018; Mafu et al., 2018; Murphy and Zerbe, 2020). However, the  
439 metabolite abundances detected in switchgrass are lower as compared to stress-elicited terpenoid  
440 accumulation in rice and maize. Given the structural distinctiveness of switchgrass diterpenoids,  
441 it is conceivable that switchgrass furanoditerpenoids exert different bioactivities in switchgrass  
442 interorganismal and environmental interactions. It also appears likely that the detected

443 switchgrass furanoditerpenoids represent lower abundant pathway intermediates that undergo  
444 further functional decorations to generate bioactive pathway end products. Indeed, among the  
445 approximately 400 known furanoditerpenoids broadly distributed across the plant kingdom, the  
446 vast majority feature extensive modifications of both the furan ring and the diterpene skeleton  
447 that may include variations of hydroxylation, carboxylation, lactonization, glycosylation and  
448 other transformations (Bao et al., 2016).

449 Integrating sequence comparison, molecular dynamics analysis and site-directed  
450 mutagenesis proved a powerful tool for identifying active site residues contributing to  
451 CYP71Z25-29 catalysis and substrate specificity. The relative ease by which the substrate  
452 specificity of CYP71Z25 and CYP71Z27 for labdane intermediates of different stereochemistry  
453 and double bond configuration could be altered through minor active site modifications, supports  
454 a rapid P450 functional divergence during the evolution of switchgrass diterpenoid metabolism.  
455 This is exemplified by a near-complete functional conversion of CYP71Z27 to the product  
456 profile of CYP71Z25 with a single S86 to F substitution. However, loss of activity in the  
457 reciprocal CYP71Z25 variant suggests that different active site positions play major roles in  
458 product specificity among the identified P450s. Indeed, proximity of the F86 aromatic ring to the  
459 docked substrate in CYP71Z27 supports a role in substrate orientation in the active site crevice,  
460 whereas introduction of a bulky Phe side chain in the CYP71Z25 cavity may lead to steric  
461 hindrance of substrate binding and catalysis (Fig. 3C). Further mechanistic insight was gained  
462 from substitution of a conserved Ser in the SRS5 domain shown to be imperative for catalysis by  
463 hydrogen-bonding to the substrate. Molecular dynamics results suggest that substitution of this  
464 position for Thr leads to reduced conformational flexibility and associated side chain rotations  
465 that are critical for hydrogen bond formation with the substrate. Paired with the substrate

466 promiscuity of CYP71Z25-29, these mechanistic insights provide a foundation for producing a  
467 broader range of furanoditerpenoid natural products. Notably, many plant furanoditerpenoids  
468 have been associated with therapeutic bioactivities ranging from anti-allergic and anti-diabetic to  
469 anti-cancer and anti-viral efficacies, whereby the furan group serves as a key pharmacophore  
470 (Bao et al., 2016). In this context, the potential of combinatorial pathway reconstruction for  
471 diterpenoid manufacturing is highlighted by the capacity of CYP71Z25 and CYP71Z26 to form  
472 the corresponding di-hydroxy and furan-derivatives of **25**, the precursor in the biosynthesis of  
473 salvinorin A (Pelot et al., 2017), a natural product of *S. divinorum* that was identified as a drug  
474 candidate for treatment of drug addictions due to its agonistic activity on brain kappa-opioid  
475 receptors (Kivell et al., 2014). Increased catalytic specificity observed in two CYP71Z25  
476 variants further underscores the potential of structure-guided protein engineering for enabling  
477 desired P450 activities as more mechanistic insight into diTPS and P450 functions is gained.

478

## 479 **Materials and Methods**

### 480 **Gene synthesis**

481 CYP71Z25-29 were synthesized as codon-optimized and N-terminally modified genes by  
482 replacement of the sequence upstream of the LPP motif with the leader sequence  
483 MAKKTSSKGK (Swaminathan et al., 2009) (Table S2) and individually inserted into MCS2 of  
484 a pETDuet-1 vector ([www.emdmillipore.com](http://www.emdmillipore.com)) carrying the full-length, codon-optimized maize  
485 cytochrome P450 reductase (*ZmCPR2*) in MCS1. Gene synthesis and cloning were performed by  
486 DOE Joint Genome Institute (JGI) with support through a DNA Synthesis Award (#2568). In  
487 addition, the multi residue variants of CYP71Z25 and CYP71Z27 were obtained from GenScript  
488 ([www.genscript.com](http://www.genscript.com)).

489

## 490 *E. coli* co-expression assays

491 Co-expression of diTPSs and P450s was conducted in an *E. coli* platform engineered for  
492 diterpenoid production (Morrone et al., 2010; Murphy et al., 2019). In brief, pIRS and pGGxC  
493 plasmids (Morrone et al., 2010) carrying class II diTPSs with distinct products [*ent*-CPP **7** (*Z.*  
494 *mays* AN2; (Harris et al., 2005) used here in place of the native *PvCPS14* due to its higher  
495 catalytic activity), *syn*-CPP **9** (*O. sativa* CPS4; (Xu et al., 2004) used here in place of the native  
496 *PvCPS8* due to its higher catalytic activity), (+)-CPP **20** (*Abies grandis* abietadiene synthase  
497 variant D621A; (Morrone et al., 2010)), 8,13-CPP **10** (*PvCPS3*), 7,13-CPP **21** (*Grindelia robusta*  
498 7,13-CPP synthase (Zerbe et al., 2015)), *ent*-LPP **8** (*PvCPS11*), *cis-trans*-CLPP **11** (*PvCPS1*),  
499 *trans-cis*-CLPP **22** (*Salvia divinorum* CPS2; (Pelot et al., 2016) were co-expressed with different  
500 P450 genes. For additional co-expression of class I diTPSs, respective genes sub-cloned into the  
501 pET28b(+) expression vector were used (Pelot et al., 2018). Constructs were co-transformed into  
502 *E. coli* BL21DE3-C43 cells (www.lucigen.com) and cultures were grown at 37°C and 200 rpm  
503 in 50 mL Terrific Broth (TB) medium to an OD<sub>600</sub> of ~0.5-0.6 before cooling to 16°C, and  
504 induction with 1 mM isopropyl-β-D-1-thiogalacto-pyranoside (IPTG) and addition of 40 mM  
505 sodium pyruvate, 1 mM MgCl<sub>2</sub>, 5 mg L<sup>-1</sup> riboflavin and 75 mg L<sup>-1</sup> 5-aminolevulinic acid. After  
506 72 h incubation, metabolites were extracted with hexane and air-dried for GC-MS analysis on an  
507 Agilent 7890B GC interfaced with a 5977 Extractor XL MS Detector at 70 eV and 1.2 mL min<sup>-1</sup>  
508 He flow, using an Agilent DB-XLB column (30 m, 250 μm i.d., 0.25 μm film) and the following  
509 GC parameters: 50°C for 3 min, 15°C min<sup>-1</sup> to 300°C, hold 3 min with pulsed splitless injection  
510 at 250°C. MS data from 40-400 mass-to-charge ratio (*m/z*) were collected after a 13 min solvent

511 delay. Metabolite quantification (n=3) was based on normalization to the internal standard 1-  
512 eicosene ([www.sigmaaldrich.com](http://www.sigmaaldrich.com)) and OD<sub>600</sub> at time of induction of protein expression.

513

#### 514 **NMR analysis**

515 For NMR analysis,  $\geq 1$  mg of diterpene products was enzymatically produced as outlined  
516 above and purified by silica chromatography and semi-preparative HPLC as previously  
517 described (Murphy et al., 2019). Purified compounds were dissolved in deuterated chloroform  
518 (CDCl<sub>3</sub>; [www.sigmaaldrich.com](http://www.sigmaaldrich.com)) containing 0.03% (v/v) tetramethylsilane (TMS). NMR 1D (<sup>1</sup>H  
519 and <sup>13</sup>C) and 2D (HSQC, COSY, HMBC and NOESY) spectra were acquired on a Bruker  
520 Avance III 800 MHz spectrometer ([www.bruker.com](http://www.bruker.com)) equipped with a 5 mm CPTCI cryoprobe  
521 using Bruker TopSpin 3.2 software and analyzed with MestReNova 11.0.2 software  
522 (<https://mestrelab.com/>). Chemical shifts were calibrated against known chloroform (<sup>1</sup>H 7.26 and  
523 <sup>13</sup>C 77.0 ppm) signals.

524

#### 525 **Homology modeling and molecular docking**

526 Homology models CYP71Z25-29 were generated with RosettaCM (Song et al., 2013) using  
527 the crystal structure of *Salvia miltiorrhiza* CYP76AH1 (Gu et al., 2019) (PDB-ID: 5YM3) as a  
528 template, and the lowest energy models were selected for docking with RosettaDock (Meiler and  
529 Baker, 2006; Davis and Baker, 2009). Input native protein structures almost invariably have  
530 regions that score poorly with force fields due to energetic strain, and minimization protocols  
531 commonly lead to increased deviation from original wild-type structure representing stable  
532 proteins. To mitigate these limitations cycles of minimization with combined backbone/sidechain  
533 restraints that are Pareto-optimal with respect to RMSD to the native structure and energetic

534 strain reduction were used to relax the template protein structure (Nivón et al., 2013). The full-  
535 length sequences for all targets and templates were aligned using PROMALS3D (Pei and  
536 Grishin, 2014). Each target sequence was respectively threaded onto each template and threaded  
537 partial models aligned in a single global frame. Full-chain models were then generated by Monte  
538 Carlo sampling guided by the Rosetta low-resolution energy function supplemented with  
539 distance restraints from the template structures and a penalty for separation in space of residues  
540 adjacent in the sequence. Structures were built using a Rosetta “fold tree” (Das and Baker,  
541 2008). The global position of each segment was represented in Cartesian space, whereas the  
542 residue backbone and side-chain conformation in each segment were represented in torsion  
543 space. Using the aligned target and template sequences, evolutionary constraints were calculated  
544 and used for modeling (Thompson and Baker, 2011). A total of 500 homology models were  
545 generated for each variant, where the model with the lowest overall protein score (“total score”)  
546 was utilized for docking each substrate. First, the heme co-factor was docked into the model,  
547 followed by docking of the substrate variations [i.e., three possible C15 and C16 substitution  
548 arrangements for all five tested substrates: hydroxy (C15=OH, C16=H), pyrophosphate  
549 (C15=OPP, C16=H) and dihydroxy (C15=OH, C16=OH)] into the heme-model complex. The  
550 reactive carbon was heavily weighted within Rosetta to be constrained to a distance of  $2\pm 1$  Å.  
551 Each docking simulation generated 1,000 docked poses that were filtered by “high” constraint  
552 (CST) scores, subsequently by total score (Sc) for the lowest 25%, and by interaction energy (IE)  
553 for the remaining lowest 25%.

554

555 **Site-directed mutagenesis**

556 Select point mutants were generated using whole-plasmid PCR amplification with site-  
557 specific sense and anti-sense oligonucleotides (Table S3) and Phusion HF Master Mix  
558 polymerase (www.neb.com). *Dpn1* treatment was applied to remove template plasmids before  
559 transformation into DH5 $\alpha$  cells for plasmid propagation. All mutants were sequence verified and  
560 functionally characterized using *E. coli* co-expression assays as described above.

561

### 562 ***In vivo* feeding study**

563 For substrate feeding assays, the constructs pETDuet-1:*ZmCPR2/CYP71Z25* and pETDuet-  
564 1:*ZmCPR2/CYP71Z29* were individually expressed in *E. coli* as described above. Expression of  
565 the base plasmid pETDuet-1:*ZmCPR2* was used as a control. At the time of IPTG induction of  
566 protein expression, 10  $\mu$ M of the diterpene alcohol substrates, **15** or **16**, dissolved in 1:1 (v/v)  
567 DMSO:MeOH were added to the culture, followed by incubation and metabolite analysis as  
568 outlined above.

569

### 570 **Metabolite profiling of tissue extracts**

571 Frozen tissue (~500 mg) was ground to a fine powder and metabolites were extracted in  
572 hexane:ethyl acetate (Hex:EA; 80:20) with shaking overnight at 200 RPM at 12°C. Root extracts  
573 were air-dried, re-dissolved in Hex:EA, and concentrated to a volume of 1 mL for GC-MS  
574 analysis as outlined above. Leaf extracts were treated in the same manner with the addition of  
575 partially purifying extracts over a mock silica column as previously described prior to analysis  
576 by GC-MS (Muchlinski et al., 2019). Relative metabolite quantification (n=3) was based on  
577 normalization of the analytes to the internal standard (1-eicosene; www.sigmaaldrich.com) and  
578 gDW.

579

## 580 **Transcriptome profiling of drought-elicited switchgrass tissues**

581 Switchgrass plants (var. Alamo AP13) were propagated from tillers to maintain low genetic  
582 variation. Plants were cultivated in 9.5 L pots in a randomized block design under greenhouse  
583 conditions to reproductive stage R1, with a 16hr light/8hr dark photoperiod and ~22/17°C  
584 day/night temperature prior to drought treatment. Drought stress treatment was applied by  
585 withholding water for four weeks, compared to control plants receiving daily drip irrigation with  
586 nutrient solution. Relative soil water content was measured weekly using a HydroSense II probe  
587 (Campbell Scientific). Leaf and root tissue of droughted and control plants (n=6) were collected  
588 weekly and flash-frozen in liquid nitrogen for later processing. Total RNA was extracted from  
589 100 mg of tissue using a Monarch® Total RNA Miniprep Kit ([www.neb.com](http://www.neb.com)) and treated with  
590 *DNase I* for genomic DNA removal. Preparation of cDNA libraries and transcriptome  
591 sequencing was performed by Novogene Co. Ltd. (<https://en.novogene.com>). In brief, following  
592 RNA integrity analysis and quantitation, cDNA libraries were generated using a  
593 NEBNext®Ultra™RNA Library Prep Kit ([www.neb.com](http://www.neb.com)) and sequenced on an Illumina  
594 Novaseq 6000 sequencing platform generating 40-80 million 150 bp paired-end reads per  
595 sample. Raw reads were processed using FastQC  
596 ([www.bioinformatics.babraham.ac.uk/projects/fastqc/](http://www.bioinformatics.babraham.ac.uk/projects/fastqc/)), and high-quality reads were aligned to  
597 the reference genome (*P. virgatum* var. Alamo AP13 v5.1) using HISAT2. Heatmaps were  
598 generated using the ‘pheatmap’ package in R ([cran-project.org](http://cran-project.org), version 3.6.3).

599

## 600 **Phylogenetic analysis**



601 A maximum likelihood phylogenetic tree was generated using the PhyML ([http://www.atgc-](http://www.atgc-montpellier.fr/phyml/)  
602 [montpellier.fr/phyml/](http://www.atgc-montpellier.fr/phyml/)) server with four rate substitution categories, LG substitution model,  
603 BIONJ starting tree and 500 bootstrap repetitions (Guindon et al., 2010).

604

#### 605 **Accession numbers**

606 Nucleotide sequences of P450 genes and enzymes characterized in this study are available  
607 on Phytozome (<https://phytozome.jgi.doe.gov>): *CYP71Z25* (*Pavir.1KG341400*), *CYP71Z26*  
608 (*Pavir.1KG382300*), *CYP71Z27* (*Pavir.1KG382400*), *CYP71Z28* (*Pavir.ING304500*),  
609 *CYP71Z29* (*Pavir.ING309700*). Gene identifiers based on *P. virgatum* (var. Alamo AP13)  
610 genome (version v5.1). The RNA-seq data have been submitted to the Sequence Read Archive  
611 (SRA), accession no. PRJNA644234.

612

#### 613 **Acknowledgements**

614 We gratefully acknowledge the US Department of Energy Joint Genome Institute (DOE JGI) and  
615 collaborators for prepublication access to the *Panicum virgatum* v1.1 and v4.1 genome sequence  
616 data produced by DOE JGI. We further thank Dr. Reuben Peters (Iowa State University, USA)  
617 for providing the pIRS and pGGxC constructs, the UC Davis Genome Center Bioinformatics  
618 Core for providing high-performance computing resources, and Dr. Malay Saha (Nobel Research  
619 Institute, USA) for providing tillers of *P. virgatum* var. Alamo AP13.

620

#### 621 **Author Contributions**

622 P.Z. conceived the original research and oversaw data analysis; A.M. and M.J. performed most  
623 experiments and data analyses; K.T. conducted plant drought stress experiments, metabolite

624 profiling of plant tissues, and transcriptome analysis; J.S.F. and J.S. performed protein modeling  
625 and molecular docking studies; K.A.P. performed NMR structural analyses; L.C., D.D and Y.C.  
626 assisted with site-directed mutagenesis studies; J.T.L. performed gene synteny studies; A.M.,  
627 M.J. and P.Z. wrote the article with contributions from all authors. All authors have read and  
628 approved the manuscript.

629

### 630 **Conflict of interest statement**

631 The authors declare that they have no conflict of interest in accordance with the journal policy.

632

### 633 **Funding**

634 Financial support for this work was provided by the U.S. Department of Energy (DOE) Early  
635 Career Research Program (DE-SC0019178, to PZ), and a DOE Joint Genome Institute (JGI)  
636 DNA Synthesis Science Program (grant #2568, to PZ). The gene synthesis work conducted by  
637 the U.S. Department of Energy Joint Genome Institute (JGI), a DOE Office of Science User  
638 Facility, is supported by the Office of Science of the U.S. Department of Energy under Contract  
639 No. DE-AC02-05CH11231.

640

### 641 **Supplementary Information:**

642 **Fig. S1:** Identification of CYP71Z25-29 paralogs.

643 **Fig. S2:** Diterpenoid-metabolic pathways and compounds relevant to this study.

644 **Fig. S3:** Functional characterization of switchgrass CYP71Z25-29.

645 **Fig S4:** NMR analysis of *syn*-15,16-epoxy-8(17),13(16),14-triene (17).

646 **Fig S5:** NMR analysis of 15,16-epoxy-8,13(16),14-triene (18).

- 647 **Fig. S6:** NMR analysis of *cis-trans*-15,16-epoxy-cleroda-3,13(16),14-triene (19).
- 648 **Fig. S7:** Functional characterization of switchgrass P450s.
- 649 **Fig. S8:** NMR analysis of (+)-15,16-epoxy-8(17),13(16),14-triene (23).
- 650 **Fig. S9:** Substrate specificity of switchgrass CYP71Z25-29.
- 651 **Fig. S10:** Structural analysis of CYP71Z25-29.
- 652 **Fig. S11:** *In planta* accumulation of furanoditerpenoids in drought-treated switchgrass roots.
- 653 **Table S1:** Average and standard deviation for each interaction energy (IE) value of filtered  
654 docking poses for each P450-substrate combination.
- 655 **Table S2:** Synthetic genes used in this study.
- 656 **Table S3:** Oligonucleotides used in this study.
- 657 **Table S4:** Abbreviations and accession numbers for proteins used for phylogenetic studies.
- 658
- 659

## Parsed Citations

Bailey-Serres J, Parker JE, Ainsworth EA, Oldroyd GED, Schroeder JI (2019) Genetic strategies for improving crop yields. *Nature* 575: 109-118

Google Scholar: [Author Only](#) [Title Only](#) [Author and Title](#)

Banerjee A, Hamberger B (2018) P450s controlling metabolic bifurcations in plant terpene specialized metabolism. *Phytochem Rev* 17: 81-111

Google Scholar: [Author Only](#) [Title Only](#) [Author and Title](#)

Bao H, Zhang Q, Ye Y, Lin L (2016) Naturally occurring furanoditerpenoids: distribution, chemistry and their pharmacological activities. *Phytochemistry Reviews* 16: 235-270

Google Scholar: [Author Only](#) [Title Only](#) [Author and Title](#)

Bennetzen JL, Schmutz J, Wang H, Percifield R, Hawkins J, Pontaroli AC, Estep M, Feng L, Vaughn JN, Grimwood J, Jenkins J, Barry K, Lindquist E, Hellsten U, Deshpande S, Wang X, Wu X, Mitros T, Triplett J, Yang X, Ye CY, Mauro-Herrera M, Wang L, Li P, Sharma M, Sharma R, Ronald PC, Panaud O, Kellogg EA, Brutnell TP, Doust AN, Tuskan GA, Rokhsar D, Devos KM (2012) Reference genome sequence of the model plant *Setaria*. *Nat Biotechnol* 30: 555-561

Google Scholar: [Author Only](#) [Title Only](#) [Author and Title](#)

Bertea CM, Schalk M, Karp F, Maffei M, Croteau R (2001) Demonstration that menthofuran synthase of mint (*Mentha*) is a cytochrome P450 monooxygenase: Cloning, functional expression, and characterization of the responsible gene. *Archives of Biochemistry and Biophysics* 390: 279-286

Google Scholar: [Author Only](#) [Title Only](#) [Author and Title](#)

Bevan MW, Uauy C, Wulff BB, Zhou J, Krasileva K, Clark MD (2017) Genomic innovation for crop improvement. *Nature* 543: 346-354

Google Scholar: [Author Only](#) [Title Only](#) [Author and Title](#)

Christensen SA, Huffaker A, Sims J, Hunter CT, Block A, Vaughan MM, Willett D, Romero M, Myroie JE, Williams WP, Schmelz EA (2018) Fungal and herbivore elicitation of the novel maize sesquiterpenoid, zealexin A4, is attenuated by elevated CO<sub>2</sub>. *Planta* 247: 863-873

Google Scholar: [Author Only](#) [Title Only](#) [Author and Title](#)

Das R, Baker D (2008) Macromolecular modeling with rosetta. *Annu Rev Biochem* 77: 363-382

Google Scholar: [Author Only](#) [Title Only](#) [Author and Title](#)

Davis IW, Baker D (2009) RosettaLigand docking with full ligand and receptor flexibility. *J Mol Biol* 385: 381-392

Google Scholar: [Author Only](#) [Title Only](#) [Author and Title](#)

Ding Y, Murphy KM, Poretsky E, Mafu S, Yang B, Char SN, Christensen SA, Saldivar E, Wu M, Wang Q, Ji L, Schmitz RJ, Kremling KA, Buckler ES, Shen Z, Briggs SP, Bohlmann J, Sher A, Castro-Falcon G, Hughes CC, Huffaker A, Zerbe P, Schmelz EA (2019) Multiple genes recruited from hormone pathways partition maize diterpenoid defences. *Nat Plants* 5: 1043-1056

Google Scholar: [Author Only](#) [Title Only](#) [Author and Title](#)

DOE-JGI *Panicum hallii* v2.0, DOE-JGI, <http://phytozome.jgi.doe.gov>.

DOE-JGI(b) *Panicum hallii* v3.1 (Hall's panicgrass) FIL2 var. *filipes*. In, <http://phytozome.jgi.doe.gov/>

Dueholm B, Krieger C, Drew D, Olry A, Kamo T, Taboureau O, Weitzel C, Bourgaud F, Hehn A, Simonsen HT (2015) Evolution of substrate recognition sites (SRSs) in cytochromes P450 from Apiaceae exemplified by the CYP71AJ subfamily. *BMC Evol Biol* 15: 122

Google Scholar: [Author Only](#) [Title Only](#) [Author and Title](#)

Gu M, Wang M, Guo J, Shi C, Deng J, Huang L, Chang Z (2019) Crystal structure of CYP76AH1 in 4-PI-bound state from *Salvia miltiorrhiza*. *Biochem Biophys Res Commun* 511: 813-819

Google Scholar: [Author Only](#) [Title Only](#) [Author and Title](#)

Guindon S, Dufayard JF, Lefort V, Anisimova M, Hordijk W, Gascuel O (2010) New algorithms and methods to estimate maximum-likelihood phylogenies: assessing the performance of PhyML 3.0. *Syst. Biol.* 59: 307-321

Google Scholar: [Author Only](#) [Title Only](#) [Author and Title](#)

Harris LJ, Saparno A, Johnston A, Priscic S, Xu M, Allard S, Kathiresan A, Ouellet T, Peters RJ (2005) The maize An2 gene is induced by *Fusarium* attack and encodes an ent-copalyl diphosphate synthase. *Plant Mol Biol* 59: 881-894

Google Scholar: [Author Only](#) [Title Only](#) [Author and Title](#)

Horie K, Inoue Y, Sakai M, Yao Q, Tanimoto Y, Koga J, Toshima H, Hasegawa M (2015) Identification of UV-Induced Diterpenes Including a New Diterpene Phytoalexin, Phytocassane F, from Rice Leaves by Complementary GC/MS and LC/MS Approaches. *J Agric Food Chem* 63: 4050-4059

Google Scholar: [Author Only](#) [Title Only](#) [Author and Title](#)

Jez JM, Lee SG, Shero AM (2016) The next green movement: Plant biology for the environment and sustainability. *Science* 353: 1241-1244

Google Scholar: [Author Only](#) [Title Only](#) [Author and Title](#)

Karunanithi PS, Berrios DI, Wang S, Davis J, Shen T, Fiehn O, Maloof JN, Zerbe P (2020) The foxtail millet (*Setaria italica*) terpene

**synthase gene family. Plant J**

Google Scholar: [Author Only Title Only Author and Title](#)

**Kivell BM, Ewald AW, Prisinzano TE (2014) Salvinorin A analogs and other kappa-opioid receptor compounds as treatments for cocaine abuse. *Adv Pharmacol* 69: 481-511**

Google Scholar: [Author Only Title Only Author and Title](#)

**Liu Y, Zhang X, Tran H, Shan L, Kim J, Childs K, Ervin EH, Frazier T, Zhao B (2015) Assessment of drought tolerance of 49 switchgrass (*Panicum virgatum*) genotypes using physiological and morphological parameters. *Biotechnol Biofuels* 8: 152**

Google Scholar: [Author Only Title Only Author and Title](#)

**Lovell JT, Jenkins J, Lowry DB, Mamidi S, Sreedasyam A, Weng X, Barry K, Bonnette J, Campitelli B, Daum C, Gordon SP, Gould BA, Khasanova A, Lipzen A, MacQueen A, Palacio-Mejia JD, Plott C, Shakirov EV, Shu S, Yoshinaga Y, Zane M, Kudrna D, Talag JD, Rokhsar D, Grimwood J, Schmutz J, Juenger TE (2018) The genomic landscape of molecular responses to natural drought stress in *Panicum hallii*. *Nat Commun* 9: 5213**

Google Scholar: [Author Only Title Only Author and Title](#)

**Lovell JT, MacQueen AH, Mamidi S, Bonnette J, Jenkins J, Napier JD, Sreedasyam A, Healey A, Session A, Shu S, Barry K, Bonos S, Boston L, Daum C, Deshpande S, Ewing A, Grabowski PP, Haque T, Harrison M, Jiang J, Kudrna D, Lipzen A, Pendergast TH, Plott C, Qi P, Sasaki CA, Shakirov EV, Sims D, Sharma M, Sharma R, Stewart A, Singan VR, Tang Y, Thibivillier S, Webber J, Weng X, Williams M, Wu GA, Yoshinaga Y, Zane M, Zhang L, Zhang J, Behrman KD, Boe AR, Fay PA, Fritschi FB, Jastrow JD, Lloyd-Reilley J, Martinez-Reyna JM, Matamala R, Mitchell RB, Rouquette FM, Ronald P, Saha M, Tobias CM, Udvardi M, Wang RA, Wu Y, Bartley LE, Casler M, Devos KM, Lowry DB, Rokhsar DS, Grimwood J, Juenger TE, Schmutz J (2021) Genomic mechanisms of climate adaptation in polyploid bioenergy switchgrass. *Nature***

Google Scholar: [Author Only Title Only Author and Title](#)

**Mafu S, Ding Y, Murphy KM, Yaacoobi O, Addison JB, Wang Q, Shen Z, Briggs SP, Bohlmann J, Castro-Falcon G, Hughes CC, Betsiashvili M, Huffaker A, Schmelz EA, Zerbe P (2018) Discovery, biosynthesis and stress-related accumulation of dolabradiene-derived defenses in maize. *Plant Physiol***

Google Scholar: [Author Only Title Only Author and Title](#)

**Mao H, Liu J, Ren F, Peters RJ, Wang Q (2016) Characterization of CYP71Z18 indicates a role in maize zealexin biosynthesis. *Phytochemistry* 121: 4-10**

Google Scholar: [Author Only Title Only Author and Title](#)

**Meiler J, Baker D (2006) ROSETTALIGAND: protein-small molecule docking with full side-chain flexibility. *Proteins* 65: 538-548**

Google Scholar: [Author Only Title Only Author and Title](#)

**Meyer E, Aspinwall MJ, Lowry DB, Palacio-Mejia JD, Logan TL, Fay PA, Juenger TE (2014) Integrating transcriptional, metabolomic, and physiological responses to drought stress and recovery in switchgrass (*Panicum virgatum* L.). *BMC Genomics* 15: 1-15**

Google Scholar: [Author Only Title Only Author and Title](#)

**Morrone D, Hillwig ML, Mead ME, Lowry L, Fulton DB, Peters RJ (2011) Evident and latent plasticity across the rice diterpene synthase family with potential implications for the evolution of diterpenoid metabolism in the cereals. *Biochem J* 435: 589-595**

Google Scholar: [Author Only Title Only Author and Title](#)

**Morrone D, Lowry L, Determan MK, Hershey DM, Xu M, Peters RJ (2010) Increasing diterpene yield with a modular metabolic engineering system in *E. coli*: comparison of MEV and MEP isoprenoid precursor pathway engineering. *Appl Microbiol Biotechnol* 85: 1893-1906**

Google Scholar: [Author Only Title Only Author and Title](#)

**Muchlinski A, Chen X, Lovell JT, Köllner TG, Pelot KA, Zerbe P, Ruggiero M, Callaway L, Laliberte S, Chen F, Tholl D (2019) Biosynthesis and Emission of Stress-Induced Volatile Terpenes in Roots and Leaves of Switchgrass (*Front Plant Sci* 10: 1144**

**Murphy KM, Chung S, Fogla S, Minsky HB, Zhu KY, Zerbe P (2019) A Customizable Approach for the Enzymatic Production and Purification of Diterpenoid Natural Products. *J Vis Exp***

Google Scholar: [Author Only Title Only Author and Title](#)

**Murphy KM, Ma LT, Ding Y, Schmelz EA, Zerbe P (2018) Functional Characterization of Two Class II Diterpene Synthases Indicates Additional Specialized Diterpenoid Pathways in Maize (*Zea mays*). *Front Plant Sci* 9: 1542**

Google Scholar: [Author Only Title Only Author and Title](#)

**Murphy KM, Zerbe P (2020) Specialized diterpenoid metabolism in monocot crops: Biosynthesis and chemical diversity. *Phytochemistry* 172: 112289**

Google Scholar: [Author Only Title Only Author and Title](#)

**Nelson R, Wiesner-Hanks T, Wissner R, Balint-Kurti P (2018) Navigating complexity to breed disease-resistant crops. *Nat Rev Genet* 19: 21-33**

Google Scholar: [Author Only Title Only Author and Title](#)

**Nivón LG, Moretti R, Baker D (2013) A Pareto-optimal refinement method for protein design scaffolds. *PLoS One* 8: e59004**

Google Scholar: [Author Only Title Only Author and Title](#)

**Park HL, Lee SW, Jung KH, Hahn TR, Cho MH (2013) Transcriptomic analysis of UV-treated rice leaves reveals UV-induced phytoalexin biosynthetic pathways and their regulatory networks in rice. *Phytochemistry* 96: 57-71**

Google Scholar: [Author Only](#) [Title Only](#) [Author and Title](#)

**Pei J, Grishin NV (2014) PROMALS3D: multiple protein sequence alignment enhanced with evolutionary and three-dimensional structural information. *Methods Mol Biol* 1079: 263-271**

Google Scholar: [Author Only](#) [Title Only](#) [Author and Title](#)

**Pelot KA, Chen R, Hagelthorn DM, Young CA, Addison JB, Muchlinski A, Tholl D, Zerbe P (2018) Functional diversity of diterpene synthases in the biofuel crop switchgrass. *Plant Physiol***

Google Scholar: [Author Only](#) [Title Only](#) [Author and Title](#)

**Pelot KA, Mitchell R, Kwon M, Hagelthorn DM, Wardman JF, Chiang A, Bohlmann J, Ro DK, Zerbe P (2016) Biosynthesis of the psychotropic plant diterpene salvinorin A: Discovery and characterization of the *Salvia divinorum* clerodienyl diphosphate synthase. *Plant J***

Google Scholar: [Author Only](#) [Title Only](#) [Author and Title](#)

**Pelot KA, Mitchell R, Kwon M, Hagelthorn DM, Wardman JF, Chiang A, Bohlmann J, Ro DK, Zerbe P (2017) Biosynthesis of the psychotropic plant diterpene salvinorin A: Discovery and characterization of the *Salvia divinorum* clerodienyl diphosphate synthase. *Plant J* 89: 885-897**

Google Scholar: [Author Only](#) [Title Only](#) [Author and Title](#)

**Peters RJ (2010) Two rings in them all: the labdane-related diterpenoids. *Nat Prod Rep* 27: 1521-1530**

Google Scholar: [Author Only](#) [Title Only](#) [Author and Title](#)

**Savary S, Willocquet L, Pethybridge SJ, Esker P, McRoberts N, Nelson A (2019) The global burden of pathogens and pests on major food crops. *Nature Ecology & Evolution* 3: 430+**

Google Scholar: [Author Only](#) [Title Only](#) [Author and Title](#)

**Schmelz EA, Huffaker A, Sims JW, Christensen SA, Lu X, Okada K, Peters RJ (2014) Biosynthesis, elicitation and roles of monocot terpenoid phytoalexins. *Plant J* 79: 659-678**

Google Scholar: [Author Only](#) [Title Only](#) [Author and Title](#)

**Schmer MR, Vogel KP, Mitchell RB, Perrin RK (2008) Net energy of cellulosic ethanol from switchgrass. *Proc Natl Acad Sci U S A* 105: 464-469**

Google Scholar: [Author Only](#) [Title Only](#) [Author and Title](#)

**Song Y, DiMaio F, Wang RY, Kim D, Miles C, Brunette T, Thompson J, Baker D (2013) High-resolution comparative modeling with RosettaCM. *Structure* 21: 1735-1742**

Google Scholar: [Author Only](#) [Title Only](#) [Author and Title](#)

**Swaminathan S, Morrone D, Wang Q, Fulton DB, Peters RJ (2009) CYP76M7 is an ent-cassadiene C11 $\alpha$ -hydroxylase defining a second multifunctional diterpenoid biosynthetic gene cluster in rice. *Plant Cell* 21: 3315-3325**

Google Scholar: [Author Only](#) [Title Only](#) [Author and Title](#)

**Tholl D (2015) Biosynthesis and biological functions of terpenoids in plants. *Adv Biochem Eng Biotechnol* 148: 63-106**

Google Scholar: [Author Only](#) [Title Only](#) [Author and Title](#)

**Thompson J, Baker D (2011) Incorporation of evolutionary information into Rosetta comparative modeling. *Proteins* 79: 2380-2388**

Google Scholar: [Author Only](#) [Title Only](#) [Author and Title](#)

**Vaughan MM, Christensen S, Schmelz EA, Huffaker A, McAuslane HJ, Alborn HT, Romero M, Allen LH, Teal PE (2015) Accumulation of terpenoid phytoalexins in maize roots is associated with drought tolerance. *Plant Cell Environ* 38: 2195-2207**

Google Scholar: [Author Only](#) [Title Only](#) [Author and Title](#)

**Vaughan MM, Huffaker A, Schmelz EA, Dafoe NJ, Christensen S, Sims J, Martins VF, Swerbilow J, Romero M, Alborn HT, Allen LH, Teal PE (2014) Effects of elevated [CO<sub>2</sub>] on maize defence against mycotoxicogenic *Fusarium verticillioides*. *Plant Cell Environ* 37: 2691-2706**

Google Scholar: [Author Only](#) [Title Only](#) [Author and Title](#)

**Wu Y, Hillwig ML, Wang Q, Peters RJ (2011) Parsing a multifunctional biosynthetic gene cluster from rice: Biochemical characterization of CYP71Z6 & 7. *FEBS Lett* 585: 3446-3451**

Google Scholar: [Author Only](#) [Title Only](#) [Author and Title](#)

**Wu Y, Zhou K, Toyomasu T, Sugawara C, Oku M, Abe S, Usui M, Mitsuhashi W, Chono M, Chandler PM, Peters RJ (2012) Functional characterization of wheat copalyl diphosphate synthases sheds light on the early evolution of labdane-related diterpenoid metabolism in the cereals. *Phytochemistry* 84: 40-46**

Google Scholar: [Author Only](#) [Title Only](#) [Author and Title](#)

**Xingxing Li ADJ, Robert L. Last Switchgrass metabolomics reveals striking genotypic and developmental differences in saponins. In, Vol doi: <https://doi.org/10.1101/2020.06.01.127720>**

Google Scholar: [Author Only](#) [Title Only](#) [Author and Title](#)

**Xu M, Hillwig ML, Priscic S, Coates RM, Peters RJ (2004) Functional identification of rice syn-copalyl diphosphate synthase and its role in initiating biosynthesis of diterpenoid phytoalexin/allelopathic natural products. *Plant J* 39: 309-318**

Google Scholar: [Author Only](#) [Title Only](#) [Author and Title](#)

**Xu M, Wilderman PR, Morrone D, Xu J, Roy A, Margis-Pinheiro M, Upadhyaya NM, Coates RM, Peters RJ (2007) Functional characterization of the rice kaurene synthase-like gene family. *Phytochemistry* 68: 312-326**

Google Scholar: [Author Only](#) [Title Only](#) [Author and Title](#)

**Zerbe P, Bohlmann J (2015) Plant diterpene synthases: exploring modularity and metabolic diversity for bioengineering. *Trends Biotechnol* 33: 419-428**

Google Scholar: [Author Only](#) [Title Only](#) [Author and Title](#)

**Zerbe P, Rodriguez SM, Mafu S, Chiang A, Sandhu HK, O'Neil-Johnson M, Starks CM, Bohlmann J (2015) Exploring diterpene metabolism in non-model species: transcriptome-enabled discovery and functional characterization of labda-7,13E-dienyl diphosphate synthase from *Grindelia robusta*. *Plant J* 83: 783-793**

Google Scholar: [Author Only](#) [Title Only](#) [Author and Title](#)

**Zhou K, Xu M, Tiernan M, Xie Q, Toyomasu T, Sugawara C, Oku M, Usui M, Mitsuhashi W, Chono M, Chandler PM, Peters RJ (2012) Functional characterization of wheat ent-kaurene(-like) synthases indicates continuing evolution of labdane-related diterpenoid metabolism in the cereals. *Phytochemistry* 84: 47-55**

Google Scholar: [Author Only](#) [Title Only](#) [Author and Title](#)

**Zi J, Mafu S, Peters RJ (2014) To gibberellins and beyond! Surveying the evolution of (di)terpenoid metabolism. *Annu Rev Plant Biol* 65: 259-286**

Google Scholar: [Author Only](#) [Title Only](#) [Author and Title](#)
